# Supplementary material for: The in silico identification of human bile salt export pump (ABCB11) inhibitors associated with cholestatic drug-induced liver injury
Source: Royal Society of Chemistry journal article supplement (doi:10.1039/c6mb00744a), 2017-01-05
Supplement: c6mb00744a1.csv [file c6mb00744a1.csv]

ID	SMILES
1	C(CCl)NC(=O)N(CCCl)N=O
2	CCCCOC(=O)c1ccc(cc1)N
3	Cc1cc(cc(c1Cl)C)O
4	c1c(c(=O)[nH]c(=O)[nH]1)F
5	c1cc2cccnc2c(c1)O
6	CC/C(=N\O)/C(=C/c1ccc(cc1)F)/C
7	CC(=O)c1ccc2c(c1)N(c3ccccc3S2)CCCN(C)C
8	CC(=O)Nc1ccc(cc1)O
9	CC(=O)Nc1ccccc1
10	CC(=O)OCC[N+](C)(C)C
11	c1cc(c(cc1Cl)Cl)COC(Cn2ccnc2)c3ccc(cc3Cl)Cl
12	CC(=O)Nc1ccc(cc1)CC(=O)O
13	c1nc2c(=O)[nH]c(nc2n1COCCO)N
14	c1[nH]c2c(ncnc2n1)N
15	CCN(CC)CCOC(=O)C(c1ccccc1)c2ccccc2
16	CC(C)(C)NCC(c1ccc(c(c1)CO)O)O
17	CCCS(=O)CCCN(CC)CC(COc1ccc(cc1)C#N)O
18	C[C@](Cc1ccc(c(c1)O)O)(C(=O)O)N
19	CCCN(CCC)C(=O)Cc1c(nc2n1cc(cc2)Cl)c3ccc(cc3)Cl
20	CN(C)c1nc(nc(n1)N(C)C)N(C)C
21	COCCOc1cc2c(cc1OCCOC)ncnc2Nc3cccc(c3)C#C
22	c1(c(nc(c(n1)Cl)N)N)C(=O)NC(=N)N
23	CCC1(CCC(=O)NC1=O)c2ccc(cc2)N
24	c1cc(ccc1C(=O)NCC(=O)O)N
25	CCCCc1c(c2ccccc2o1)C(=O)c3cc(c(c(c3)I)OCCN(CC)CC)I
26	CCOC(=O)C1=C(NC(=C(C1c2ccccc2Cl)C(=O)OC)C)COCCN
27	CCN(CC)Cc1cc(ccc1O)Nc2ccnc3c2ccc(c3)Cl
28	c1ccc2c(c1)N=C(c3cc(ccc3O2)Cl)N4CCNCC4
29	c1cnccc1c2cc(c(=O)[nH]c2)N
30	c1ccc(cc1)CN(CC2=NCCN2)c3ccccc3
31	Cc1cc(=O)n(n1C)c2ccccc2
32	CN1CCc2cccc-3c2[C@H]1Cc4c3c(c(cc4)O)O
33	c1ccc(cc1)CCOCCS(=O)(=O)NCCNCCc2ccc(c3c2sc(=O)[nH]3)O
34	CN1CCC=C(C1)C(=O)OC
35	CCc1cccc(c1CNc2cc(cn3c2nc(c3C)C)C(=O)N)C
36	CCN(CC)C(=O)c1ccc(cc1)C(=C2CCNCC2)c3ccccc3
37	CNC(=O)c1cc(ccn1)Oc2ccc(cc2)NC(=O)Nc3ccc(c(c3)C(F)(F)F)Cl
38	C[C@@H]1C[C@H]2[C@@H]3CCC4=CC(=O)C=C[C@@]4([C@]3([C@H](C[C@@]2([C@]1(C(=O)CO)O)C)O)F)C
39	COC(=O)[C@H](Cc1ccccc1)NC(=O)[C@H](CC(=O)O)N
40	COc1ccc(cc1)CCN2CCC(CC2)Nc3nc4ccccc4n3Cc5ccc(cc5)F
41	c1ccc(c(c1)C(=O)NCC(=O)O)N
42	Cc1ccc(cc1n2cnc3ccc(cc3c2=O)N4CCN(CC4)C)NC(=O)c5ccnc(c5)N6CCOCC6
43	CC[C@@H](c1ccccc1)NC(=O)c2c3ccccc3nc(c2O)c4ccccc4
44	CC1(O[C@@H]2CO[C@@]3([C@H]([C@@H]2O1)OC(O3)(C)C)COS(=O)(=O)N)C
45	C[C@@H]1C[C@H]2[C@@H]3CCC4=CC(=O)C=C[C@@]4([C@]3([C@H](C[C@@]2([C@H]1C(=O)CO)C)O)F)C
46	CCCC(=O)OCOC(=O)C1=C(NC(=C(C1c2cccc(c2Cl)Cl)C(=O)OC)C)C
47	CN1[C@@H]2C[C@H](C[C@H]1[C@H]3[C@@H]2O3)OC(=O)[C@H](CO)c4ccccc4
48	CCOC(=O)C(CCc1ccccc1)NC2CCc3ccccc3N(C2=O)CC(=O)O
49	CN(C)c1c2c(ncn1)n(cn2)C3C(C(C(O3)CO)N)O
50	CCCSc1nc(c2c(n1)n(cn2)[C@H]3[C@@H]([C@@H]([C@H](O3)CO)O)O)N
51	CCC(=O)OC(C(C)C)OP(=O)(CCCCc1ccccc1)CC(=O)N2CC(CC2C(=O)O)C3CCCCC3
52	Cc1c(c(n[nH]1)C)Cc2c(c3c(=O)n(c(=O)n(c3s2)CC(C)C)C)C(=O)N4C[C@@H](CO4)O
53	C[C@@](C(=O)Nc1ccc(cc1Cl)S(=O)(=O)c2ccc(cc2)C(=O)N(C)C)(C(F)(F)F)O
54	Cc1c(c(n[nH]1)C)Cc2c(c3c(=O)n(c(=O)n(c3s2)C(C)C)C)C(=O)N4C[C@@H](CO4)O
55	Cc1cc(on1)c2ccc(cc2F)N3C[C@@H](OC3=O)Cn4ccnn4
56	C([C@@H]1[C@@H]([C@@H]([C@H]([C@@H](O1)O[C@H]([C@@H](CO)O)[C@@H]([C@H](CO)O)O)O)O)O)O
57	c1ccc(c(c1)C(=O)NCCCCCCCC(=O)O)O
58	CCOCCNS(=O)(=O)c1ccc(cc1)Nc2nccc(n2)c3cnc(n3C(C)C)C
59	COC(=O)NN=Cc1c[n+](c2ccccc2[n+]1[O-])[O-]
60	c1ccc(cc1)CCOCCCS(=O)(=O)CCCNCCc2ccc(c3c2sc(=O)[nH]3)O
61	Cc1nc(c(n1Cc2c(c3c(=O)n(c(=O)n(c3s2)CC(C)C)C)C(=O)N(C)OC)Cl)Cl
62	CNC[C@@H](Cc1ccc(c(c1)C(=O)NCC23CC4CC(C2)CC(C4)C3)Cl)O
63	c1cc(cnc1)CC[C@H](COc2ccc(cc2)c3ccc(s3)S(=O)(=O)N)O
64	Cc1ccc(cc1NC(=O)c2cccc(c2)CN3CCN(CC3)C)NC(=O)c4cccc5c4oc6c5cccc6
65	Cc1ccc(cc1NC(=O)CC23CC4CC(C2)CC(C4)C3)C(=O)N5CC6CNCC(C5)O6
66	Cc1ccc2c(c1)c(c(n2CC(=O)O)C)c3ccnc4c3cccc4C
67	c1ccc2c(c1)CC(C(=O)N2C[C@H](CO)O)NC(=O)c3cc4cc(ccc4[nH]3)Cl
68	CCCCCC(C1C(CC(CC(CC(CC(CC(CC(/C(=C/C=C/C=C/C=C/C=C/C(C(OC1=O)C)O)/C)O)O)O)O)O)O)O)O
69	CCCc1ncc(n1CC)c2ccnc(n2)Nc3ccc(cc3)S(=O)(=O)NCCOC
70	CCc1ncc(n1C(C)C)c2ccnc(n2)Nc3ccc(cc3)S(=O)(=O)NCCOC
71	Cc1ccc2c(c1)c(c(n2CC(=O)O)C)c3ccnc4c3cccc4C(F)(F)F
72	c1ccc2c(c1)CC(C(=O)N2C[C@H](CO)O)NC(=O)c3cc4cc(sc4[nH]3)Cl
73	Cc1ccc2c(c1)c(c(n2CC(=O)O)C)c3ccnc4c3cccc4Cl
74	CN1[C@@H]2CC[C@H]1C[C@H](C2)OC(c3ccccc3)c4ccccc4
75	c1cc(c(cc1Cn2c3ccsc3cc2C(=O)O)Cl)Cl
76	C[C@@H](CN1c2ccccc2Sc3c1cc(cc3)OC)CN(C)C
77	c1cc(ccc1c2ccc(o2)/C=N/N3CC(=O)NC3=O)[N+](=O)[O-]
78	C[C@H]([C@@H]1[C@H]2CC(=C(N2C1=O)C(=O)O)SCCNC=N)O
79	CN1CCC[C@H]1c2cccnc2
80	c1ccc(cc1)C2=C(C(=O)N(C2=O)Cc3ccc(nc3)N)Nc4ccc(cc4)N5CCOCC5
81	CC(C)(CO)[C@H](C(=O)NCCCO)O
82	CCCSc1nc(c2c(n1)n(cn2)[C@H]3[C@@H]([C@@H]([C@H](O3)COP(=O)(O)OP(=O)(C(P(=O)(O)O)(Cl)Cl)O)O)O)N
83	C[C@H](CO)NCCCc1ccc(c(c1)C(=O)NCC23CC4CC(C2)CC(C4)C3)Cl
84	CC(C)(C)NC[C@H](c1ccc(c(c1)CO)O)O
85	CC(=O)Nc1ccccc1OC[C@](C)(CNC2CCN(CC2)Cc3ccc(cc3)Cl)O
86	c1cc(c(cc1Cn2c3ccc(cc3cc2C(=O)O)O)C(F)(F)F)Cl
87	CC(=O)Nc1ccccc1OC[C@H](CNC2CCN(CC2)Cc3ccc(cc3)Cl)O
88	CC[C@@H]1[C@@]([C@@H]([C@H](C(=O)[C@@H](C[C@]([C@@H]([C@H]([C@H]([C@H](C(=O)O1)C)O[C@H]2C[C@@]([C@H]([C@@H](O2)C)O)(C)OC)C)O[C@H]3[C@@H]([C@H](C[C@H](O3)C)N(C)C)O)(C)OC)C)C)O)(C)O
89	CS(=O)(=O)Oc1ccc(cc1)OCCc2ccc(cc2)C[C@@H](C(=O)O)SCCc3ccc(cc3)O
90	c1cnc(nc1)CCC[C@@H](CS(=O)(=O)N2CCN(CC2)c3ccc(cn3)Cl)N(C=O)O
91	CC(=O)OC1C(Sc2ccccc2N(C1=O)CCN(C)C)c3ccc(cc3)OC
92	C[C@]12CC[C@@H]3c4ccc(cc4CC[C@H]3[C@@H]1CC[C@]2(C#C)O)OC
93	C1[C@H]([C@@H]([C@H]([C@@H]([C@H]1N)O[C@@H]2[C@@H]([C@H]([C@@H]([C@H](O2)CO)O)O)N)O[C@H]3[C@@H]([C@@H]([C@H](O3)CO)O[C@@H]4[C@@H]([C@H]([C@@H]([C@@H](O4)CN)O)O)N)O)O)N
94	C[C@H]1C[C@H]2[C@@H]3CC[C@@]([C@]3(C[C@@H]([C@@H]2[C@@]4(C1=CC(=O)C=C4)C)O)C)(C(=O)CO)O
95	C[C@H]1[C@@H]([C@H]([C@H]([C@@H](O1)O[C@H]2C[C@H]([C@@]3([C@@H]4[C@@H](CC[C@@]3(C2)O)[C@]5(CC[C@@H]([C@]5(C[C@H]4O)C)C6=CC(=O)OC6)O)CO)O)O)O)O
96	CCCCC[C@@H](/C=C/[C@H]1[C@@H](CC(=O)[C@@H]1C/C=C\CCCC(=O)O)O)O
97	CCCC(c1ccccc1)(c2ccccc2)C(=O)OCCN(CC)CC
98	C[C@]12C[C@@H]([C@]3(C(C1C[C@H]([C@@]2(C(=O)CO)O)O)CCC4=CC(=O)C=C[C@@]43C)F)O
99	CCS(=O)(=O)c1ccc(c(c1)F)c2cc(ccc2OCC(=O)O)Cl
100	C[C@]12CC[C@H]3[C@H]([C@@H]1CC[C@]2(C#C)O)CCC4=Cc5c(cno5)C[C@]34C
101	C[C@H](CC(=O)Nc1c2ccc(nc2ccc1Cl)N3CC[C@@H](C3)N)c4ccccc4
102	c1ccc(cc1)C(=O)N[C@@H](Cc2ccc(cc2)O)C(=O)Nc3ccc(cc3)C(=O)O
103	c1cc(nc2c1c(c(cc2)Cl)C(=O)NCC3CCCCC3)N4CC[C@@H](C4)N
104	c1ccc(c(c1)CCNC(=O)c2cc(ccc2Cl)n3c(=O)[nH]c(=O)cn3)Cl
105	Cc1c(c2c3c4c1O[C@@](C4=O)(O/C=C/[C@@H]([C@H]([C@H]([C@@H]([C@@H]([C@@H]([C@H]([C@H](/C=C/C=C(\C(=O)Nc(c2O)c(c3O)/C=N/N5CCN(CC5)C)/C)C)O)C)O)C)OC(=O)C)C)OC)C)O
106	CCOC(=O)[C@H](CCc1ccccc1)N[C@@H](C)C(=O)N2Cc3ccccc3C[C@H]2C(=O)O
107	Cc1c(c(no1)c2c(cccc2Cl)Cl)C(=O)N[C@H]3[C@@H]4N(C3=O)[C@H](C(S4)(C)C)C(=O)O
108	Cc1ccc(cc1n2cnc3ccc(cc3c2=O)N4CCN(CC4)C)NC(=O)c5cccc(c5)c6ccco6
109	C[C@]1(c2cccc(c2C(=O)C3=C([C@]4(C(CC31)[C@@H](C(=C(C4=O)C(=O)N)O)N(C)C)O)O)O)O
110	CN1[C@@H]2CC[C@H]1C[C@H](C2)OC(=O)C(CO)c3ccccc3
111	CN1[C@@H]2CC[C@H]1C[C@H](C2)OC(=O)C(c3ccccc3)O
112	CN1CCN(CC1)c2ccccc2C=C3C(=O)N(CCS3)c4ccc(c(c4)Cl)Cl
113	CC(C)(C(=O)O)O/N=C(/c1csc(n1)N)\C(=O)N[C@H]2[C@@H]3N(C2=O)C(=C(CS3)C[n+]4ccccc4)C(=O)O
114	C1[C@@H](C(=O)N[C@H](C(=O)N[C@H](C(=O)N/C(=C/NC(=O)N)/C(=O)N[C@H](C(=O)N1)C2CC(NC(=N)N2)O)CO)CO)NC(=O)CC(CCCN)N
115	CC1[C@@]([C@H](C(O1)OC2C(C(C(C(C2O)O)NC(=N)N)O)NC(=N)N)OC3[C@@H]([C@H]([C@@H]([C@H](O3)CO)O)O)NC)(C=O)O
116	c1ccc(cc1)[C@@H]2C[C@H]2N
117	C[C@]1([C@H]2CC[C@H](C2)C1(C)C)NC
118	C=CC1CN2CCC1CC2C(c3ccnc4c3cccc4)O
119	COC(=O)[C@H]1[C@H](CC[C@@H]2[C@@H]1C[C@H]3c4c(c5ccccc5[nH]4)CCN3C2)O
120	CN1[C@@H]2CC[C@H]1C[C@H](C2)OC(=O)[C@H](CO)c3ccccc3
121	CC[C@@H](CO)NC(=O)[C@H]1CN([C@@H]2Cc3cn(c4c3c(ccc4)C2=C1)C)C
122	C[N+]1([C@@H]2C[C@H](C[C@H]1[C@H]3[C@@H]2O3)OC(=O)C(c4cccs4)(c5cccs5)O)C
123	c1cc(c2c3c1C[C@@H]4[C@]5([C@]3(CCN4CC6CC6)[C@@H](O2)C(=O)CC5)O)O
124	c1c(c(=O)[nH]c(=O)n1[C@H]2C[C@@H]([C@H](O2)CO)O)C(F)(F)F
125	C[C@H](CCC(=O)O)[C@H]1CC[C@@H]2[C@@]1(CC[C@H]3[C@H]2[C@H](C[C@H]4[C@@]3(CC[C@H](C4)O)C)O)C
126	C=CCN1CC[C@]23c4c5ccc(c4O[C@H]2C(=O)CC[C@]3([C@H]1C5)O)O
127	C[C@](CS(=O)(=O)c1ccc(cc1)F)(C(=O)Nc2ccc(c(c2)C(F)(F)F)C#N)O
128	Cc1cccc(c1NC(=O)[C@H]2CCCCN2C)C
129	Cc1ccc(cc1NC(=O)c2cccc(c2)OC3CCN(CC3)C(C)C)NC(=O)c4cccc5c4oc6c5cccc6
130	Cc1ccc(c(c1)[N+](=O)[O-])OC(C)(C)[C@H]2OC[C@H]([C@H](O2)c3cccnc3)C/C=C\CCC(=O)O
131	CCCCCC(C)(/C=C/[C@H]1[C@@H](C[C@@H]([C@@H]1C/C=C\CCCC(=O)O)O)O)O
132	CC1=C(N2C([C@@H](C2=O)NC(=O)C(C3=CCC=CC3)N)SC1)C(=O)O
133	CC1([C@@H](N2[C@H](S1)[C@@H](C2=O)NC(=O)[C@@H](c3ccc(cc3)O)N)C(=O)O)C
134	CC[C@@H]1[C@@]([C@@H]([C@H](C(=O)[C@@H](C[C@@]([C@@H]([C@H]([C@@H]([C@H](C(=O)O1)C)O[C@H]2C[C@@]([C@H]([C@@H](O2)C)O)(C)OC)C)O[C@H]3[C@@H]([C@H](C[C@H](O3)C)N(C)C)O)(C)O)C)C)O)(C)O
135	COc1ccc2c(c1)c(ccn2)[C@H](C3CC4CCN3CC4C=C)O
136	CN(C)c1c2c(ncn1)n(cn2)C3[C@@H]([C@@H]([C@H](O3)CO)NC(=O)C(Cc4ccc(cc4)OC)N)O
137	C[C@]12C[C@@H]([C@H]3[C@H]([C@@H]1CC[C@@]2(C(=O)CO)O)CCC4=CC(=O)C=C[C@]34C)O
138	C[C@]12CCC(=O)C=C1CC[C@@H]3[C@@H]2[C@H](C[C@]4([C@H]3CC[C@@]4(C(=O)CO)O)C)O
139	C[C@]12CC[C@@H]3c4ccc(cc4CC[C@H]3[C@@H]1CC[C@]2(C#C)O)O
140	CC12CCN(C1N(c3c2cc(cc3)OC(=O)NC)C)C
141	C[C@]12CC[C@H]3[C@H]([C@@H]1CC[C@@H]2C(=O)CO)CCC4=CC(=O)CC[C@]34C
142	C[C@@H](C(=O)O)Oc1ccc(cc1c2ccc(c(c2)C(F)(F)F)S(=O)(=O)C)C(F)(F)F
143	C=CC1=C(N2[C@@H]([C@@H](C2=O)NC(=O)/C(=N\OCC(=O)O)/c3csc(n3)N)SC1)C(=O)O
144	c1c(n(c(=N)nc1N2CCCCC2)O)N
145	Cc1c(c2c3c4c1O[C@@](C4=O)(O/C=C/[C@@H]([C@H]([C@H]([C@@H]([C@@H]([C@@H]([C@H]([C@H](/C=C/C=C(\C(=O)NC(=C5C3=NC6(N5)CCN(CC6)CC(C)C)C2=O)/C)C)O)C)O)C)OC(=O)C)C)OC)C)O
146	c1ccc(cc1)OCCC[N+]23CCC(CC2)[C@H](C3)OC(=O)C(c4cccs4)(c5cccs5)O
147	C[C@]12CC[C@H]3[C@H]([C@@H]1CC[C@]2(C#C)O)CCC4=CC(=O)CC[C@H]34
148	C[C@@H](C(=O)N[C@H]1c2ccccc2CCN(C1=O)C)NC(=O)[C@H](C(C)C)O
149	CC1(C(=O)Nc2c(ccc(n2)Nc3c(cnc(n3)Nc4cc(c(c(c4)OC)OC)OC)F)O1)C
150	CCCCCCCCCCCCc1ccc(cc1)S(=O)(=O)Nc2nncs2
151	c1ccc(c(c1)C(=O)O)S
152	CC[C@@H]1[C@@]([C@@H]([C@H](N(C[C@@H](C[C@@]([C@@H]([C@H]([C@@H]([C@H](C(=O)O1)C)O[C@H]2C[C@@]([C@H]([C@@H](O2)C)O)(C)OC)C)O[C@H]3[C@@H]([C@H](C[C@H](O3)C)N(C)C)O)(C)O)C)C)C)O)(C)O
153	Cc1cc(cc(c1c2[nH]c3cc(ccc3n2)c4nnc(o4)Nc5cccc(c5)Cl)C)CCC(=O)O
154	COc1cccc(c1)N2C(=NC(=NC23CCCCC3)N)N
155	c1ccc(cc1)CCC(CS(=O)(=O)N2CCN(CC2)c3ccc(cc3)F)N(C=O)O
156	c1cnc(nc1)CCCC(CS(=O)(=O)N2CCN(CC2)c3ccc(cc3)F)N(C=O)O
157	Cc1cccc(c1NC(=O)NC(=N)NC)C
158	CC(=O)NC[C@H]1CN(C(=O)O1)c2ccc(c(c2)F)N3CCOCC3
159	c1cnc(nc1)CCC(CS(=O)(=O)N2CCN(CC2)c3ccc(cn3)Cl)N(C=O)O
160	CN(C)C(=N)NC(=N)N
161	CN1CCc2cc3c(c(c2C1C4c5ccc(c(c5C(=O)O4)OC)OC)OC)OCO3
162	c1cnc(nc1)CCCC(CS(=O)(=O)N2CCC(CC2)Oc3ccc(cn3)Cl)N(C=O)O
163	CC1(CC(CC(N1[O])(C)C)O)C
164	Cc1cc(ncn1)N2CCN(CC2)C(=O)N3CCN(CC3)S(=O)(=O)c4ccc(cc4)Br
165	c1ccc2c(c1)[nH]c(n2)c3[nH]c4ccccc4n3
166	CCOc1cc(ccc1C(=O)OC)NC(=O)C
167	CC(CCC(=O)O)C1CCC2C1(C(=O)CC3C2C(=O)CC4C3(CCC(=O)C4)C)C
168	CC(C)(C)c1cc2c(=O)cc(oc2c(c1)C(C)(C)C)C(=O)O
169	c1ccc(cc1)CCC(CS(=O)(=O)N2CCN(CC2)c3ccc(cc3)F)C(=O)NO
170	c1c(cc(cc1[N+](=O)[O-])[N+](=O)[O-])C(=O)N
171	CCOCn1cnc2c1c(=O)n(c(=O)n2C)CCCCC(C)(C)O
172	CC1CC2C3CC(C4=CC(=O)C=CC4(C3C(CC2(C1(C(=O)COC(=O)C)O)C)O)C)F
173	c1cc2c(cc(n2Cc3ccc(c(c3)Cl)Cl)C(=O)O)c(c1)OCCCO
174	CCCc1ncc(c(n1)N)C[n+]2ccccc2C
175	c1cc(oc1)c2nc3nc(nc(n3n2)N)NCCN4CCOCC4
176	Cc1cc2c([nH]1)ccc(c2F)Oc3c4cc(c(cc4ncn3)OCCCN5CCCCC5)OC
177	CN1CCc2cc3c(cc2C1C4c5ccc(c(c5C(=O)O4)OC)OC)OCO3
178	CNCC(c1cccc(c1)O)O
179	c1ccc(cc1)CCC(CS(=O)(=O)N2CCN(CC2)c3ccc(cn3)Cl)N(C=O)O
180	CN1CCc2cccc-3c2C1Cc4c3c(c(cc4)O)O
181	CC(CO)c1ccc2cc(ccc2c1)OC
182	CC(C)(C)NCC(COc1c(nsn1)N2CCOCC2)O
183	c1cc(c(cc1[N+](=O)[O-])Cl)C(=O)N
184	CC(C)(C)NCC(COc1cccc2c1CC(C(C2)O)O)O
185	c1cc(cnc1)CCC(CS(=O)(=O)N2CCN(CC2)c3ccc(cn3)Cl)N(C=O)O
186	c1ccnc(c1)CCC(CS(=O)(=O)N2CCN(CC2)c3ccc(cn3)Cl)N(C=O)O
187	CC(=O)Oc1ccc2c(c1)cc(n2Cc3ccc(c(c3)Cl)Cl)C(=O)O
188	CC(=O)NC[C@H]1CN(C(=O)O1)c2cc(c(c(c2)F)C3=CCN(CC3)C(=O)CO)F
189	Cc1cc2c(o1)cc(n2Cc3ccc(c(c3)Cl)Cl)C(=O)O
190	CC(=O)NC[C@H]1CN(C(=O)O1)c2ccc(cc2)C(=O)c3cnc4n3cc(cc4)Cl
191	CC(=O)NC[C@H]1CN(C(=O)O1)c2ccc(c(c2)F)n3cc(nc3)Br
192	c1cc(cnc1)CCC(CS(=O)(=O)N2CCC(CC2)Oc3ccc(cn3)Cl)N(C=O)O
193	c1cc(c(cc1Cn2c(cc3c2ncs3)C(=O)O)Cl)Cl
194	COc1c2cc(ccc2n(c1C(=O)O)Cc3ccc(c(c3)Cl)Cl)O
195	CN(Cc1cnc2c(n1)c(nc(n2)N)N)c3ccc(cc3)C(=O)N[C@@H](CCC(=O)O)C(=O)O
196	Cc1cc([nH]n1)Nc2c(cnc(n2)NCc3cc(no3)c4ccccn4)Cl
197	c1cc(c(cc1Cn2c3ccc(cc3cc2C(=O)O)O)Cl)Cl
198	CCN(CC)C(=O)c1ccc(cc1)C(=C2CCNCC2)c3cccc(c3)F
199	CCC1C(COC1=O)Cc2cncn2C
200	C[N+](C)(C)CC(CC(=O)O)O
201	CC(=CCC1C(O1)(C)C2C(C(CCC23CO3)OC(=O)C=CC=CC=CC=CC(=O)O)OC)C
202	c1cc(oc1C=NN2CC(=O)NC2=O)[N+](=O)[O-]
203	CC(C)N=c1cc-2n(c3ccccc3nc2cc1Nc4ccc(cc4)Cl)c5ccc(cc5)Cl
204	CNC(=C[N+](=O)[O-])NCCSCc1ccc(o1)CN(C)C
205	CC(C(C)(C)C)NC(=NC#N)Nc1ccncc1
206	Cc1c(nc[nH]1)CSCCN=C(NC)NC#N
207	C1C(C(C(C(C1N)OC2C(C(C(C(O2)CN)O)O)N)OC3C(C(C(O3)CO)OC4C(C(C(C(O4)CN)O)O)N)O)O)N
208	C[C@@](C(=O)Nc1ccc(cc1Cl)S(=O)(=O)c2ccc(cc2)NCCO)(C(F)(F)F)O
209	C[n+]1ccccc1C=NO
210	CCCCCCCCC=CCCCCCCCC(=O)OCC(COP(=O)(O)OCC[N+](C)(C)C)OC(=O)CCCCCCCC=CCCCCCCCC
211	CCN(c1ccccc1C)C(=O)C=CC
212	CCCc1c(ccc(c1O)C(=O)C)OCCCOc2ccc3c(=O)cc(oc3c2CCC)CCC(=O)O
213	CCCc1c2c(cc3c1oc(cc3=O)C(=O)O)CCCC2
214	CN(C)N=Nc1c(nc[nH]1)C(=O)N
215	CCCc1c2c(cc3c1oc(cc3=O)C(=O)O)c(cc(n2)C(=O)O)Cl
216	c1cc(c(cc1[C@H](CN)O)O)O
217	CCCc1c2c(cc3c1oc(cc3=O)C(=O)O)c(cc(n2)C(=O)O)N(C)C(=O)C
218	c1cc(ccc1c2ccncc2)C(=O)N3CCN(CC3)S(=O)(=O)c4cc5cc(ccc5[nH]4)Cl
219	CCCc1c2c(cc3c1oc(cc3=O)C(=O)O)c(=O)cc([nH]2)C(=O)O
220	CCCc1c2c(cc3c1oc(cc3=O)C(=O)O)c(=O)cc(o2)C(=O)O
221	CCCc1c2c(cc3c1oc(cc3=O)C(=O)O)c(cc(n2)C(=O)O)C(F)(F)F
222	CC1=C([C@H](C(=C(N1)C)C(=O)OC(C)C)c2cccc3c2non3)C(=O)OC
223	COc1ccc(cc1)Nc2ccn(n2)c3ccccc3
224	Cc1cccc(c1S(=O)c2[nH]c3ccccc3n2)c4cc(ccn4)OC
225	Cc1cc(cc(c1OC(=O)C)C)Nc2ccn(n2)c3ccccc3
226	CCc1cc(c2c(c1O)c(=O)cc(o2)C(=O)O)CC
227	CCCc1ccc(c2c1oc(cc2=O)C(=O)O)OCC(C)O
228	C[C@](Cc1ccc(c(c1)O)O)(C(=O)O)NN
229	c1cc(c(cc1Cn2c3ccc(c(c3cc2C(=O)O)F)O)Cl)Cl
230	c1cc(c(c(c1)Cl)C=NNC(=N)N)Cl
231	c1ccc(cc1)[C@H]2C[C@@H]2N
232	c1cc(c(cc1CN2CCNCC2)C(=O)NCC34CC5CC(C3)CC(C5)C4)Cl
233	c1cc(ccc1[C@H]([C@@H](CO)NC(=O)C(Cl)Cl)O)[N+](=O)[O-]
234	CC(C)C(=O)N[C@@H](CS)C(=O)O
235	C1CNC(=N)NC1C2C(=O)NCC(C(=O)NC(C(=O)NC(C(=O)N/C(=C\NC(=O)N)/C(=O)N2)CNC(=O)CC(CCCN)N)CO)N
236	CCCC(=O)c1cnc2c(c1Nc3ccc(cc3C)F)cccc2OCCS(=O)C
237	CC1=C(N2[C@@H]([C@@H](C2=O)NC(=O)[C@H](c3ccc(cc3)O)N)SC1)C(=O)O
238	Cc1c(n2ccc3c(c2n1)OC(CC3)c4ccccc4)CO
239	Cn1cnc(c1Sc2c3c(nc[nH]3)ncn2)[N+](=O)[O-]
240	Cc1cccc(c1CNc2cc(cn3c2nc(c3C)C)C(=O)NCCO)C
241	C[C@H]1C[C@](CCO1)(c2cc(sc2)Sc3ccc4c(c3)CC(=O)N4C)O
242	CC(C)(C)C(=O)CN1CC2CN(CC(C1)O2)CCCNc3ccc(cc3)C#N
243	C[C@H]1C[C@H]2[C@@H]3CCC4=CC(=O)C=C[C@@]4([C@]3([C@H](C[C@@]2([C@]1(C(=O)CO)O)C)O)Cl)C
244	c1ccc(cc1)CC2Nc3cc(c(cc3S(=O)(=O)N2)S(=O)(=O)N)C(F)(F)F
245	CC(c1ccc2c(c1)nc(o2)c3ccc(cc3)Cl)C(=O)O
246	CCCCOc1cc(ccc1N)C(=O)OCCN(CC)CC
247	c1cc(c(c(c1CNNC(=O)C(CO)N)O)O)O
248	CCOC(=O)c1ccc(cc1)N
249	CCCCNc1ccc(cc1)C(=O)OCCOCCOCCOCCOCCOCCOCCOCCOCCOC
250	c1ccc(cc1)C(=O)Nc2ccc(c(c2)O)C(=O)O
251	c1ccc(cc1)CSCC2=Nc3cc(c(cc3S(=O)(=O)N2)S(=O)(=O)N)Cl
252	CC1([C@@H](N2[C@H](S1)[C@@H](C2=O)NC(=O)Cc3ccccc3)C(=O)O)C
253	CC(C)COCC(CN(Cc1ccccc1)c2ccccc2)N3CCCC3
254	CC1=C(C(CCC1)(C)C)/C=C/C(=C/C=C/C(=C/C=C/C=C(/C=C/C=C(/C=C/C2=C(CCCC2(C)C)C)\C)\C)/C)/C
255	C[N+](C)(C)CC(=O)O
256	CC(C)NCC(COc1ccc(cc1)CCOCC2CC2)O
257	CC(C[N+](C)(C)C)OC(=O)N
258	CC(C)(C(=O)O)Oc1ccc(cc1)CCNC(=O)c2ccc(cc2)Cl
259	CC(=O)Oc1ccc(cc1)C(c2ccc(cc2)OC(=O)C)c3ccccn3
260	c1ccc(c(c1)C(=O)O)O
261	CC(C)(C)c1ccc(cc1)S(=O)(=O)Nc2c(c(nc(n2)c3ncccn3)OCCO)Oc4ccccc4OC
262	CC[N+](C)(C)Cc1ccccc1Br
263	CN(Cc1cc(cc(c1N)Br)Br)C2CCCCC2
264	CCCCNc1cc(cc(c1Oc2ccccc2)S(=O)(=O)N)C(=O)O
265	CC(CCc1ccccc1)NC(C)C(c2ccc(cc2)O)O
266	CC(C(=O)c1cccc(c1)Cl)NC(C)(C)C
267	c1cnc(nc1)N2CCN(CC2)CCCCN3C(=O)CC4(CCCC4)CC3=O
268	CS(=O)(=O)OCCCCOS(=O)(=O)C
269	CCCCN(CCCC)CCCOC(=O)c1ccc(cc1)N
270	Cn1cnc2c1c(=O)n(c(=O)n2C)C
271	CSCCNc1c2c(nc(n1)SCCC(F)(F)F)n(cn2)[C@H]3[C@@H]([C@@H]([C@H](O3)COP(=O)(O)OP(=O)(C(P(=O)(O)O)(Cl)Cl)O)O)O
272	COc1cc(cc(c1OC)OC)C(=O)NCCCCCC(=O)O
273	CC(C)/C=C/CCCCC(=O)NCc1ccc(c(c1)OC)O
274	C[N+](C)(C)CCOC(=O)N
275	c1ccc2c(c1)C=Cc3ccccc3N2C(=O)N
276	CCOC(=O)n1ccn(c1=S)C
277	CN(C)CCOC(c1ccc(cc1)Cl)c2ccccn2
278	CC(C)(C)NCC(COc1cccc2c1CCC(=O)N2)O
279	CN(C)CCCN1c2ccccc2CCc3c1cc(cc3)Cl
280	CCN(CC)CCOC(=O)c1ccc(cc1Cl)N
281	CN(C)CCCN1c2ccccc2Sc3c1cc(cc3)Cl
282	CCCNC(=O)NS(=O)(=O)c1ccc(cc1)Cl
283	CN(C)CC/C=C/1\c2ccccc2Sc3c1cc(cc3)Cl
284	CCCCOc1cc(c2ccccc2n1)C(=O)NCCN(CC)CC
285	c1ccc(cc1)c2cc(c3ccccc3n2)C(=O)O
286	c1c2c(cc(c1F)N3CCNCC3)n(cc(c2=O)C(=O)O)C4CC4
287	C1[C@@H]2N(C1=O)[C@H](/C(=C/CO)/O2)C(=O)O
288	CCN(CC)CCOc1ccc(cc1)/C(=C(\c2ccccc2)/Cl)/c3ccccc3
289	c1ccc(cc1)C(c2ccccc2)(c3ccccc3Cl)n4ccnc4
290	Cc1c(c(no1)c2ccccc2Cl)C(=O)N[C@H]3[C@@H]4N(C3=O)[C@H](C(S4)(C)C)C(=O)O
291	c1cc2c(ccc(c2nc1)O)Cl
292	CN1CCN(CC1)C2=Nc3cc(ccc3Nc4c2cccc4)Cl
293	CCCCC(=O)N(Cc1ccc(cc1)c2ccccc2c3[nH]nnn3)[C@@H](C(C)C)C(=O)O
294	CC(=O)N[C@H]1CCc2cc(c(c(c2-c3c1cc(=O)c(cc3)OC)OC)OC)OC
295	C[C@]12CCC(=O)C=C1CC[C@@H]3[C@@H]2C(=O)C[C@]4([C@H]3CC[C@@]4(C(=O)CO)O)C
296	c1ccc2c(c1)ccc(=O)o2
297	c1cc2c(c(c1)OCC(COc3cccc4c3c(=O)cc(o4)C(=O)O)O)c(=O)cc(o2)C(=O)O
298	CC1CC(CC(C1)(C)C)OC(=O)C(c2ccccc2)O
299	CN(C)CCC=C1c2ccccc2C=Cc3c1cccc3
300	C1[C@H](C(=O)NO1)N
301	CCC1C(=O)N(CC(=O)N(C(C(=O)NC(C(=O)N(C(C(=O)NC(C(=O)NC(C(=O)N(C(C(=O)N(C(C(=O)N(C(C(=O)N(C(C(=O)N1)C(C(C)C/C=C/C)O)C)C(C)C)C)CC(C)C)C)CC(C)C)C)C)C)CC(C)C)C)C(C)C)CC(C)C)C)C
302	C(CS)N
303	c1cc(ccc1N)S(=O)(=O)c2ccc(cc2)N
304	Cc1cccc(c1NC(=O)c2cnc(s2)Nc3cc(nc(n3)C)N4CCN(CC4)CCO)Cl
305	c1cc(ccc1C(=O)O)OCCn2ccnc2
306	c1ccc2c(c1)CCN(C2)C(=N)N
307	COc1ccc(cc1F)c2cc(nn2c3ccc(cc3)S(=O)(=O)N)C(F)F
308	CNCCCN1c2ccccc2CCc3c1cccc3
309	CN1c2ccccc2C(=NC(C1=O)NC(=O)c3cc4ccccc4[nH]3)c5ccccc5
310	c1c(cc(c(c1I)Oc2cc(c(c(c2)I)O)I)I)C[C@@H](C(=O)O)N
311	CC1=Nc2ccc(cc2S(=O)(=O)N1)Cl
312	c1ccc2c(c1)c3ccccc3s2
313	c1c(cc(c(c1S(=O)(=O)N)Cl)Cl)S(=O)(=O)N
314	c1ccc(c(c1)CC(=O)O)Nc2c(cccc2Cl)Cl
315	c1ccc2c(c1)c(c(c(=O)o2)Cc3c(c4ccccc4oc3=O)O)O
316	CCN(CC)CCOC(=O)C1(CCCCC1)C2CCCCC2
317	c1ccc2c(c1)CN3C(=O)c4ccccc4CN3C2=O
318	CC1C(C(CC(O1)OC2C(OC(CC2O)OC3C(OC(CC3O)OC4CCC5(C(C4)CCC6C5CCC7(C6(CCC7C8=CC(=O)OC8)O)C)C)C)C)O)O
319	C[C@@H]1[C@H]([C@H](C[C@@H](O1)O[C@@H]2[C@H](O[C@H](C[C@@H]2O)O[C@@H]3[C@H](O[C@H](C[C@@H]3O)O[C@H]4CC[C@]5([C@@H](C4)CC[C@@H]6[C@@H]5C[C@H]([C@]7([C@@]6(CC[C@@H]7C8=CC(=O)OC8)O)C)O)C)C)C)O)O
320	c1ccc2c(c1)c(nnc2NN)NN
321	c1cc2c(cc(c(c2nc1)O)I)I
322	CN(C)CCOC(c1ccccc1)c2ccccc2
323	CC1(C(=O)NC(=O)O1)C
324	CCCCc1cc2ccccc2c(n1)OCCN(C)C
325	CN1CCC(CC1)OC(c2ccccc2)c3ccccc3
326	Cn1c2c(c(=O)n(c1=O)C)n(cn2)CC(CO)O
327	CCN(CC)C(=S)SSC(=S)N(CC)CC
328	CCN(CC)C(=S)S
329	CC(CCc1ccc(cc1)O)NCCc2ccc(c(c2)O)O
330	CCCCCCCCCCCCCCCCCCCCCCO
331	CN(CCc1ccc(cc1)NS(=O)(=O)C)CCOc2ccc(cc2)NS(=O)(=O)C
332	COc1cc2c(cc1OC)C(=O)C(C2)CC3CCN(CC3)Cc4ccccc4
333	c1cc(c(cc1CCN)O)O
334	c1ccc(cc1)CCNCCCCCCNCCc2ccc(c(c2)O)O
335	CC(c1ccccc1)(c2ccccn2)OCCN(C)C
336	c1ccc2c(c1)[nH]c(=O)n2C3=CCN(CC3)CCCC(=O)c4ccc(cc4)F
337	CCCCOc1ccc(cc1)C(=O)CCN2CCCCC2
338	c1ccc(cc1)n2c(=O)c3ccccc3[se]2
339	c1cc(ccc1COC(Cn2ccnc2)c3ccc(cc3Cl)Cl)Cl
340	C[C@@H](C(=O)N1CCC[C@H]1C(=O)O)N[C@@H](CCc2ccccc2)C(=O)O
341	CCCn1c2c(c(=O)[nH]c1=O)[nH]cn2
342	CCN1CCN(CC1)c2cc3c(cc2F)c(=O)c(cn3C4CC4)C(=O)O
343	c1ccc(c(c1)C#N)OCC(CNCCNC(=O)Cc2ccc(cc2)O)O
344	C[C@]12CC[C@@H]3c4ccc(cc4CC[C@H]3[C@@H]1C[C@H]([C@@H]2O)O)O
345	C[C@]12CC[C@@H]3c4ccc(cc4CC[C@H]3[C@@H]1CCC2=O)O
346	CCOc1ccc2c(c1)c(c3ccc(cc3n2)N)N
347	CCc1cc(ccn1)C(=S)N
348	CCN(CC)C(C)CN1c2ccccc2Sc3c1cccc3
349	CCC1(CC(=O)NC1=O)C
350	CCN1C(=O)C(NC1=O)c2ccccc2
351	CCOC(=O)N
352	CC(O)(P(=O)(O)O)P(=O)(O)O
353	CCOC(=O)c1cncn1C(C)c2ccccc2
354	c1ccc(cc1)C(COC(=O)N)COC(=O)N
355	c1ccc(c(c1)CC(=O)O)Oc2ccc(cc2Cl)Cl
356	c1cc(ccc1c2nc(cs2)CC(=O)O)Cl
357	CN1CC(=O)N=C1NC(=O)Nc2cccc(c2)Cl
358	c1cc(ccc1C2CNCCc3c2cc(c(c3Cl)O)O)O
359	CC(Cc1ccc(cc1)O)NCC(c2cc(cc(c2)O)O)O
360	c1cc(c(cc1OCC(F)(F)F)C(=O)NCC2CCCCN2)OCC(F)(F)F
361	Cc1c(c(no1)c2c(cccc2Cl)F)C(=O)N[C@H]3[C@@H]4N(C3=O)[C@H](C(S4)(C)C)C(=O)O
362	C[C@]12CCC(=O)C=C1[C@H](C[C@@H]3[C@@H]2[C@H](C[C@]4([C@H]3C[C@@H]5[C@]4(OC(O5)(C)C)C(=O)CO)C)O)F
363	CCOC(=O)c1c2n(cn1)-c3ccc(cc3C(=O)N(C2)C)F
364	C[C@@H]1C[C@H]2[C@@H]3C[C@@H](C4=CC(=O)C=C[C@@]4([C@]3([C@H](C[C@@]2([C@]1(C(=O)CO)O)C)O)F)C)F
365	c1ccc(cc1)/C=C/CN2CCN(CC2)C(c3ccc(cc3)F)c4ccc(cc4)F
366	C[C@H]1C[C@H]2[C@@H]3CC[C@@]([C@]3(C[C@@H]([C@@]2([C@@]4(C1=CC(=O)C=C4)C)F)O)C)(C(=O)C)O
367	CNCCC(c1ccccc1)Oc2ccc(cc2)C(F)(F)F
368	c1ccc2c(c1)N(c3cc(ccc3S2)C(F)(F)F)CCCN4CCN(CC4)CCO
369	CC(c1ccc(c(c1)F)c2ccccc2)C(=O)O
370	CC(C)C(=O)Nc1ccc(c(c1)C(F)(F)F)[N+](=O)[O-]
371	c1cc(ccc1C(=O)N[C@@H](CCC(=O)O)C(=O)O)NCc2cnc3c(n2)c(=O)nc([nH]3)N
372	c1cc(ccc1C(=O)N[C@@H](CCC(=O)O)C(=O)O)NCC2CNc3c(c(=O)[nH]c(n3)N)N2C=O
373	CCCc1c(ccc(c1O)C(=O)C)OCC(COc2ccc3c(=O)cc(oc3c2CCC)C(=O)O)O
374	c1cc(oc1)CNc2cc(c(cc2C(=O)O)S(=O)(=O)N)Cl
375	C1CCC(CC1)(CC(=O)O)CN
376	c1ccc(cc1)NC(=O)/C=C/c2c3c(cc(cc3Cl)Cl)[nH]c2C(=O)O
377	CO/N=C/1\CN(CC1CN)c2c(cc3c(=O)c(cn(c3n2)C4CC4)C(=O)O)F
378	c1ccc(c(c1)C(=O)OCC(CO)O)Nc2ccnc3c2ccc(c3)Cl
379	COc1ccc(cc1C(=O)NCCc2ccc(cc2)S(=O)(=O)NC(=O)NC3CCCCC3)Cl
380	Cc1ccc(cc1)S(=O)(=O)NC(=O)NN2CC3CCCC3C2
381	CCC1=C(CN(C1=O)C(=O)NCCc2ccc(cc2)S(=O)(=O)NC(=O)N[C@H]3CC[C@@H](CC3)C)C
382	COc1ccccc1OCC(CO)O
383	COc1ccccc1O
384	C1CCCN(CCC1)CCNC(=N)N
385	CS(=O)(=O)CCNCc1ccc(o1)c2ccc3c(c2)c(ncn3)Nc4ccc(c(c4)Cl)OCc5cccc(c5)F
386	C[C@]12CCC(=O)C=C1CC[C@@H]3[C@@]2([C@H](C[C@]4([C@H]3C[C@@H]5[C@]4(OC(O5)(C)C)C(=O)CCl)C)O)F
387	c1cc(ccc1C(=O)CCCN2CCC(CC2)(c3ccc(cc3)Cl)O)F
388	CC(=O)NCCCCCCNC(=O)C
389	c1cc(c(cc1C(CNCCCCCCNCC(c2ccc(c(c2)O)O)O)O)O)O
390	CC(CNC1CCCCC1)OC(=O)c2ccccc2
391	c1c(nc[nH]1)CCN
392	CCN(CC)CCNc1ccc(c2c1c(=O)c3ccccc3s2)CO
393	c1ccc2c(c1)cnnc2NN
394	c1c(c(cc2c1NCNS2(=O)=O)S(=O)(=O)N)C(F)(F)F
395	c1ccc(cc1)C(c2ccc(cc2)Cl)N3CCN(CC3)CCOCCO
396	CC(C)Cc1ccc(cc1)C(C)C(=O)O
397	Cc1ccc(cc1Nc2nccc(n2)c3cccnc3)NC(=O)c4ccc(cc4)CN5CCN(CC5)C
398	CCn1ccnc1CC2COc3ccccc3O2
399	c1ccc2c(c1)c(c[nH]2)CCC3CCNCC3
400	CC1Cc2ccccc2N1NC(=O)c3ccc(c(c3)S(=O)(=O)N)Cl
401	Cc1c(c2cc(ccc2n1C(=O)c3ccc(cc3)Cl)OC)CC(=O)O
402	c1ccc(cc1)C(=O)NC2CCN(CC2)CCc3c[nH]c4c3cccc4
403	c1c(c(c(c(c1I)NC(=O)CCCCC(=O)Nc2c(cc(c(c2I)C(=O)O)I)I)I)C(=O)O)I
404	CC(C)NNC(=O)c1ccncc1
405	c1ccc2c(c1)C(=O)N(S2(=O)=O)CCCCN3CCN(CC3)c4ncccn4
406	CCC(C(c1ccc(c(c1)O)O)O)NC(C)C
407	c1cnccc1C(=O)NN
408	CC(C)NCC(c1ccc(c(c1)O)O)O
409	CC(COc1ccccc1)NC(C)C(c2ccc(cc2)O)O
410	CC[C@H](C)[C@@H]1[C@H](CC[C@@]2(O1)C[C@@H]3C[C@H](O2)C/C=C(/[C@H]([C@H](/C=C/C=C/4\CO[C@H]5[C@@]4([C@@H](C=C([C@H]5O)C)C(=O)O3)O)C)O[C@H]6C[C@@H]([C@H]([C@@H](O6)C)O[C@H]7C[C@@H]([C@H]([C@@H](O7)C)O)OC)OC)\C)C
411	CC(=O)N1CCN(CC1)c2ccc(cc2)OC[C@H]3CO[C@](O3)(Cn4ccnc4)c5ccc(cc5Cl)Cl
412	CN1CCC(=C2c3ccccc3CC(=O)c4c2ccs4)CC1
413	CCC(C)(C)C(=O)O[C@H]1C[C@H](C=C2[C@H]1[C@H]([C@H](C=C2)C)CC[C@@H]3C[C@H](CC(=O)O3)O)C
414	CC(CCc1ccccc1)NCC(c2ccc(c(c2)C(=O)N)O)O
415	C[C@H](CN(c1ccccn1)C(=O)c2ccc(cc2)C#N)N3CCN(CC3)c4cccc5c4OCCO5
416	Cc1c(cno1)C(=O)Nc2ccc(cc2)C(F)(F)F
417	CC1([C@H]([C@@H](c2cc(ccc2O1)C#N)N3CCCC3=O)O)C
418	c1cc(ccc1C#N)C(c2ccc(cc2)C#N)n3cncn3
419	c1ccc(cc1)[C@H]2CN3CCSC3=N2
420	CC[C@@H](C(=O)N)N1CCCC1=O
421	C[C@H]1COc2c3n1cc(c(=O)c3cc(c2N4CCN(CC4)C)F)C(=O)O
422	Cc1c(nc(c(n1)C)C)C
423	c1cc(c(cc1Oc2c(cc(cc2I)C[C@@H](C(=O)O)N)I)I)O
424	C1CSSC1CCCCC(=O)O
425	CC(=O)Oc1c2ccc(cc2c(c(c1OC)OC)OC(=O)C)Cl
426	CCCCc1nc(c(n1Cc2ccc(cc2)c3ccccc3c4[nH]nnn4)CO)Cl
427	CCCc1c(ccc(c1O)C(=O)C)OCCCCc2[nH]nnn2
428	Cc1ccc(c(c1Cl)Nc2ccccc2C(=O)O)Cl
429	CC1=C[C@@H]2[C@H](CC[C@]3([C@H]2CC[C@@]3(C(=O)C)OC(=O)C)C)[C@@]4(C1=CC(=O)CC4)C
430	c1cc(ccc1CC(C(=O)O)N)N(CCCl)CCCl
431	CC12CC3CC(C1)(CC(C3)(C2)N)C
432	C[N+]1(CCCC(C1)OC(=O)C(c2ccccc2)(c3ccccc3)O)C
433	Cc1ccccc1OCC(CO)O
434	CCC1(C(=O)N(C(=O)N1)C)c2ccccc2
435	Cc1cc2c([nH]1)cccc2OCC(CNC(C)C)O
436	CCCNC(C)(C)COC(=O)c1ccccc1
437	CN(C)CCN(Cc1ccc(cc1)OC)c2ccccn2
438	c1cc(c(cc1N)C(=O)O)O
439	Cc1c(c(c(cn1)CO)CO)O
440	CC(C)NCC(c1cc(cc(c1)O)O)O
441	C[C@@H]([C@@H](c1cccc(c1)O)O)N
442	Cn1cc2c3c1cccc3[C@H]4C[C@H](CN([C@@H]4C2)C)CNC(=O)OCc5ccccc5
443	CN(C)CCN(Cc1cccs1)c2ccccn2
444	Cn1cc[nH]c1=S
445	COc1ccccc1OCC(COC(=O)N)O
446	CC(C(c1cc(ccc1OC)OC)O)N
447	Cc1cc(=O)[nH]c(=S)[nH]1
448	CC(=O)Nc1c(c(c(c(c1I)N(C)C(=O)C)I)C(=O)NC2C(C(C(OC2O)CO)O)O)I
449	CC(C)(c1cccnc1)C(=O)c2cccnc2
450	CN1CCN2c3ccccc3Cc4ccccc4C2C1
451	COc1cc2c(cc1OC)nc(nc2N)N3CCN(CC3)C(=O)c4ccco4
452	CCCc1c2c(cc3c1oc(cc3=O)C(=O)O)c(cc(n2)C(=O)O)NC
453	c1ccc(c(c1)C(c2ccc(cc2)Cl)C(Cl)Cl)Cl
454	COc1c2c(cc(c1N3C[C@@H]4CCCN[C@@H]4C3)F)c(=O)c(cn2C5CC5)C(=O)O
455	CCN(CC)CCNC(=O)c1ccc(cc1)NC(=O)C
456	CCN(CC)CCOC(=O)C(Cc1cccc2c1cccc2)CC3CCCO3
457	COc1ccccc1N2CCN(CC2)CC(COc3cccc4c3cccc4)O
458	c1ccc2c(c1)cccc2CC3=NCCN3
459	C[C@@H](c1ccc2cc(ccc2c1)OC)C(=O)O
460	CCCc1c2c(cc3c1oc(cc3=O)C(=O)O)c(=O)cc(n2CC)C(=O)O
461	CCc1nn(c(=O)n1CCOc2ccccc2)CCCN3CCN(CC3)c4cccc(c4)Cl
462	CN(C)C(=O)Oc1cccc(c1)[N+](C)(C)C
463	Cc1ccnc2c1NC(=O)c3cccnc3N2C4CC4
464	CC1=C(C(C(=C(N1)C)C(=O)OCCN(C)Cc2ccccc2)c3cccc(c3)[N+](=O)[O-])C(=O)OC
465	CC1=C(C(C(=C(N1)C)C(=O)OC)c2ccccc2[N+](=O)[O-])C(=O)OC
466	CC1=C(C(C(=C(N1)C#N)C(=O)OC)c2cccc(c2)[N+](=O)[O-])C(=O)OC(C)C
467	CN1Cc2c(cccc2N)C(C1)c3ccccc3
468	CC1COc2c3n1cc(c(=O)c3cc(c2N4CCN(CC4)C)F)C(=O)O
469	Cc1cc2c(s1)Nc3ccccc3N=C2N4CCN(CC4)C
470	Cc1ccccc1C(c2ccccc2)OCCN(C)C
471	CNCC(c1ccc(cc1)O)O
472	CC(C)(Cc1ccccc1)N(C)C(=O)CN(CCO)CC(=O)N(C)C(C)(C)Cc2ccccc2
473	CCCOc1ccc2c(c1)nc([nH]2)NC(=O)OC
474	CC(C)NCC(COc1ccccc1OCC=C)O
475	CC1(COC(=O)C1O)C
476	CC(C)(CO)[C@H](C(=O)NCCC(=O)O)O
477	COc1ccc(cc1OC)Cc2c3cc(c(cc3ccn2)OC)OC
478	CCCCc1ccc2c(c1)nc([nH]2)NC(=O)OC
479	CN(CC#C)Cc1ccccc1
480	c1cc(ccc1[C@@H]2CCNC[C@H]2COc3ccc4c(c3)OCO4)F
481	c1cc(ccc1C(=N)N)OCCCCCOc2ccc(cc2)C(=N)N
482	C1CCc2nnnn2CC1
483	C1CCC(CC1)C(CC2CCCCN2)C3CCCCC3
484	c1ccc2c(c1)N(c3cc(ccc3S2)Cl)CCCN4CCN(CC4)CCO
485	Cc1ccc2c(c1)c3c(n2CCc4ccc(nc4)C)CCN(C3)C
486	c1ccc(cc1)CC(=O)NC(=O)N
487	c1ccc(cc1)CCNN
488	CC(C(=O)N[C@H]1[C@@H]2N(C1=O)[C@H](C(S2)(C)C)C(=O)O)Oc3ccccc3
489	c1ccc(cc1)CCNC(=N)NC(=N)N
490	CN(C)CCC(c1ccccc1)c2ccccn2
491	CN1C(=O)CC(C1=O)c2ccccc2
492	Cc1ccc(cc1)N(CC2=NCCN2)c3cccc(c3)O
493	CC(=O)NS(=O)(=O)c1ccc(cc1)NC(=O)c2ccccc2C(=O)O
494	CC1=C(C(=O)c2ccccc2C1=O)C/C=C(\C)/CCCC(C)CCCC(C)CCCC(C)C
495	c1ccc2c(c1)[nH]c(=O)n2C3CCN(CC3)CCCC(c4ccc(cc4)F)c5ccc(cc5)F
496	CCc1ccc(nc1)CCOc2ccc(cc2)CC3C(=O)NC(=O)S3
497	CCN1CCN(C(=O)C1=O)C(=O)NC(c2ccccc2)C(=O)N[C@H]3[C@@H]4N(C3=O)[C@H](C(S4)(C)C)C(=O)O
498	CCCCOCCOCCOCc1cc2c(cc1CCC)OCO2
499	C1CC(=O)N(C1)CC(=O)N
500	CN1CCN(CC1)CC(=O)N2c3ccccc3C(=O)Nc4c2nccc4
501	c1ccc(cc1)Oc2c(cc(cc2S(=O)(=O)N)C(=O)O)N3CCCC3
502	CC(C)NCC(COc1ccc(cc1)NC(=O)C)O
503	c1ccc2c(c1)CCN3C2CN(CC3=O)C(=O)C4CCCCC4
504	CC(CCCN)Nc1cc(cc2c1nccc2)OC
505	CCCN(CCC)S(=O)(=O)c1ccc(cc1)C(=O)O
506	CC(C)(C)c1cc(cc(c1O)C(C)(C)C)SC(C)(C)Sc2cc(c(c(c2)C(C)(C)C)O)C(C)(C)C
507	CCN(CC)CCOC(=O)c1ccc(cc1)N
508	CN1CCN(CC1)CCCN2c3ccccc3Sc4c2cc(cc4)Cl
509	CC(=O)[C@H]1CC[C@@H]2[C@@]1(CC[C@H]3[C@H]2CCC4=CC(=O)CC[C@]34C)C
510	CCCNCC(COc1ccccc1C(=O)CCc2ccccc2)O
511	CC(C)[N+](C)(CCOC(=O)C1c2ccccc2Oc3c1cccc3)C(C)C
512	CC(C)NCC(COc1cccc2c1cccc2)O
513	CC(Cc1ccc2c(c1)OCO2)NCC(c3ccc(c(c3)O)O)O
514	CNCCCC1c2ccccc2C=Cc3c1cccc3
515	CCCc1c2c(c(c3c1oc(cc3=O)C(=O)O)O)CCCC2
516	CC[C@H](c1ccc(o1)C)Nc2c(c(=O)c2=O)Nc3cccc(c3O)C(=O)N(C)C
517	c1ccc2c(c1)c(nnc2Nc3ccc(cc3)Cl)Cc4ccncc4
518	C[n+]1cccc(c1)OC(=O)N(C)C
519	CCc1c(c(nc(n1)N)N)c2ccc(cc2)Cl
520	C[C@@]12CCN([C@@H]1N(c3c2cc(cc3)OC(=O)N4CCc5ccccc5C4)C)C
521	CCN(CC)CCCC(C)Nc1c2ccc(cc2nc3c1cc(cc3)OC)Cl
522	C[C@@H](C(=O)N)NCc1ccc(cc1)OCc2ccccc2F
523	c1ccc2c(c1)c3c(n2CCC(=O)O)CC[C@H](C3)NS(=O)(=O)c4ccc(cc4)F
524	CCC(=O)NCC[C@@H]1CCc2c1c3c(cc2)OCC3
525	CC(Cc1ccccc1)(c2ccccc2)NC(=O)CN
526	CCN1CCC[C@H]1CNC(=O)c2c(ccc(c2OC)Br)OC
527	COc1ccc2c(c1)[nH]c3c2CCN4[C@@H]3C[C@H]5[C@@H](C4)C[C@H]([C@@H]([C@H]5C(=O)OC)OC)OC(=O)c6cc(c(c(c6)OC)OC)OC
528	c1cc2c(cc1OC(F)(F)F)sc(n2)N
529	Cc1c(n(nc1C(=O)NN2CCCCC2)c3ccc(cc3Cl)Cl)c4ccc(cc4)Cl
530	Cc1c(c(=O)n2c(n1)CCCC2)CCN3CCC(CC3)c4c5ccc(cc5on4)F
531	c1cc(ccc1Oc2ccc(cc2)Cl)S(=O)(=O)CC3(CCOCC3)C(=O)NO
532	CS(=O)(=O)c1ccc(cc1)C2=C(C(=O)OC2)c3ccccc3
533	CCCN1CCCC[C@H]1C(=O)Nc2c(cccc2C)C
534	CN(CCOc1ccc(cc1)CC2C(=O)NC(=O)S2)c3ccccn3
535	c1ccc(c(c1)CO)O[C@H]2[C@@H]([C@H]([C@@H]([C@H](O2)CO)O)O)O
536	c1ccc(c(c1)C(=O)N)O
537	c1ccc(c(c1)C(=O)Oc2ccccc2C(=O)O)O
538	CN1C2CC(CC1C3C2O3)OC(=O)C(CO)c4ccccc4
539	CCN(CC)CCNC(=O)c1ccc(cc1)NS(=O)(=O)C
540	CC1=C(C(=O)C(=C(C1=O)C)C(CCCCCC(=O)O)c2ccccc2)C
541	CN[C@H]1CC[C@H](c2c1cccc2)c3ccc(c(c3)Cl)Cl
542	c1ccc(cc1)CCOCCCS(=O)(=O)CCNCCc2ccc(c3c2sc(=O)[nH]3)O
543	CCCc1c2c(c(=O)[nH]c(n2)c3cc(ccc3OCC)S(=O)(=O)N4CCN(CC4)C)n(n1)C
544	C[C@@H]1CC[C@H]2C[C@@H](/C(=C/C=C/C=C/[C@H](C[C@H](C(=O)[C@@H]([C@@H](/C(=C/[C@H](C(=O)C[C@H](OC(=O)[C@@H]3CCCCN3C(=O)C(=O)[C@@]1(O2)O)[C@H](C)C[C@@H]4CC[C@H]([C@@H](C4)OC)O)C)/C)O)OC)C)C)/C)OC
545	c1c(c(cc(c1F)F)F)C[C@H](CC(=O)N2CCn3c(nnc3C(F)(F)F)C2)N
546	CC(C)(C)C(=O)Oc1ccc(cc1)S(=O)(=O)Nc2ccccc2C(=O)NCC(=O)O
547	C[C@H]1[C@@H]2CC[C@]3([C@H]([C@]2(CC[C@H]1O)C)[C@@H](C[C@@H]\4[C@@]3(C[C@@H](/C4=C(/CCC=C(C)C)\C(=O)O)OC(=O)C)C)O)C
548	c1ccc(cc1)N2CNC(=O)C23CCN(CC3)CCCC(=O)c4ccc(cc4)F
549	CCOC(=O)[C@H](CCc1ccccc1)N[C@@H](C)C(=O)N2CC3(C[C@H]2C(=O)O)SCCS3
550	CCN(CC)CCNC(=O)c1c(c([nH]c1C)/C=C\2/c3cc(ccc3NC2=O)F)C
551	c1cc(ccc1NC(=O)CCC(=O)O)S(=O)(=O)Nc2nccs2
552	CC(=O)NS(=O)(=O)c1ccc(cc1)N
553	c1cc(ccc1N)S(=O)(=O)Nc2ccc(nn2)Cl
554	c1cnc(nc1)NS(=O)(=O)c2ccc(cc2)N
555	COc1cc(nc(n1)OC)NS(=O)(=O)c2ccc(cc2)N
556	Cc1cc(nc(n1)NS(=O)(=O)c2ccc(cc2)N)C
557	COc1c(ncnc1OC)NS(=O)(=O)c2ccc(cc2)N
558	Cc1ccnc(n1)NS(=O)(=O)c2ccc(cc2)N
559	Cc1nnc(s1)NS(=O)(=O)c2ccc(cc2)N
560	Cc1cc(no1)NS(=O)(=O)c2ccc(cc2)N
561	Cc1c(noc1NS(=O)(=O)c2ccc(cc2)N)C
562	CC\1=C(c2cc(ccc2/C1=C\c3ccc(cc3)S(=O)C)F)CC(=O)O
563	CCN1CCCC1CNC(=O)c2cc(ccc2OC)S(=O)(=O)N
564	Cc1ccc(cc1NC(=O)c2cccc(c2)NC(=O)Nc3cccc(c3)C(=O)Nc4cc(ccc4C)C(=O)Nc5ccc(c6c5c(cc(c6)S(=O)(=O)O)S(=O)(=O)O)S(=O)(=O)O)C(=O)Nc7ccc(c8c7c(cc(c8)S(=O)(=O)O)S(=O)(=O)O)S(=O)(=O)O
565	c1ccc2c(c1)c(c3c(n2)CCCC3)N
566	c1ccc2c(c1)C(OC2=O)OC(=O)c3cccnc3Nc4cccc(c4)C(F)(F)F
567	CC/C(=C(\c1ccccc1)/c2ccc(cc2)OCCN(C)C)/c3ccccc3
568	Cc1c2c(cs1)C(=O)Nc3ccccc3N2C(=O)CN4CCN(CC4)C
569	CC(C)(C)c1ccc(cc1)C(CCCN2CCC(CC2)C(c3ccccc3)(c4ccccc4)O)O
570	CCCCNc1ccc(cc1)C(=O)OCCN(C)C
571	C1(=C(C(=O)C(=C(C1=O)O)O)O)O
572	c1ccc2c(c1)C(=O)N(C2=O)C3CCC(=O)NC3=O
573	c1ccc2c(c1)[nH]c(n2)c3cscn3
574	CN1CCCCC1CCN2c3ccccc3Sc4c2cc(cc4)SC
575	C1CN1P(=S)(N2CC2)N3CC3
576	CN1CCN(CC1)CC/C=C\2/c3ccccc3Sc4c2cc(cc4)S(=O)(=O)N(C)C
577	c1ccc(c(c1)CN2CCc3c(ccs3)C2)Cl
578	CCS[C@@]1(CC[C@@H]2[C@@]1(C[C@@H]([C@]3([C@H]2CCC4=CC(=O)C=C[C@@]43C)F)O)C)SC
579	Cc1ccc(cc1)S(=O)(=O)NC(=O)NN2CCCCCC2
580	c1ccc(cc1)CC2=NCCN2
581	CCCCNC(=O)NS(=O)(=O)c1ccc(cc1)C
582	Cc1ccc(cc1)C(=O)c2cc(c(c(c2)O)O)[N+](=O)[O-]
583	Cc1cccc(c1)N(C)C(=S)Oc2ccc3ccccc3c2
584	CN(CC(=O)O)C(=S)c1cccc2c1ccc(c2C(F)(F)F)OC
585	Cc1cccc(c1)Nc2ccncc2S(=O)(=O)NC(=O)NC(C)C
586	CCN(CC)c1cc(nc2n1ncn2)C
587	CC1=C(C(CCC1)(C)C)/C=C/C(=C/C=C/C(=C/C(=O)O)/C)/C
588	CN1CCN(CC1)CCCN2c3ccccc3Sc4c2cc(cc4)C(F)(F)F
589	c1cc(cc(c1)C(F)(F)F)C2(CCN(CC2)CCCC(=O)c3ccc(cc3)F)O
590	CN(C)CCCN1c2ccccc2Sc3c1cc(cc3)C(F)(F)F
591	CCC(COC(=O)c1cc(c(c(c1)OC)OC)OC)(c2ccccc2)N(C)C
592	CC(CN1c2ccccc2Sc3c1cccc3)CN(C)C
593	COc1cc(cc(c1OC)OC)Cc2cnc(nc2N)N
594	COc1cc(cc(c1OC)OC)C(=O)N2CCOCC2
595	Cc1cc(=O)oc2c1cc3cc(oc3c2C)C
596	Cc1ccc(cc1)/C(=C\CN2CCCC2)/c3ccccn3
597	Cc1c(c2c(c(c1O)C)CCC(O2)(C)COc3ccc(cc3)CC4C(=O)NC(=O)S4)C
598	CCN(Cc1ccncc1)C(=O)C(CO)c2ccccc2
599	CC(C)(C)NCC(c1ccccc1Cl)O
600	Cn1c(cc(=O)n(c1=O)C)NCCCN2CCN(CC2)c3ccccc3OC
601	CCOC(=O)[C@H](CCc1ccccc1)N[C@@H](C)C(=O)N2[C@@H](SC(=N2)C(C)(C)C)C(=O)O
602	CCCC(CCC)C(=O)O
603	CN(C)CC(c1ccc(cc1)OC)C2(CCCCC2)O
604	CC(C)C(CCCN(C)CCc1ccc(c(c1)OC)OC)(C#N)c2ccc(c(c2)OC)OC
605	c1cc(c(c(c1)Cl)c2c3ccc(nn3cnc2=O)Sc4ccc(cc4F)F)Cl
606	CC(=O)CC(c1ccccc1)c2c(c3ccccc3oc2=O)O
607	c1ccc2cc(ccc2c1)CCN3CCC(=CC3)c4cccc(c4)C(F)(F)F
608	c1c2c(c(c(c1I)O)I)Oc3c(cc(c(c3I)O)I)C24c5c(c(c(c(c5Cl)Cl)Cl)Cl)C(=O)O4
609	Cc1cccc(c1NC2=NCCCS2)C
610	Cc1cc(cc(c1CC2=NCCN2)C)C(C)(C)C
611	C[C@H](CC(=O)O)COc1ccc(cc1)N2CCN(CC2)c3ccncc3
612	Cc1cnc(c(n1)OC)NS(=O)(=O)c2cccnc2c3ccc(cc3)CC(C)C
613	C[C@](C(=O)Nc1ccc(cc1)C(=O)c2ccccc2)(C(F)(F)F)O
614	Cc1cc(ccc1n2c(=O)c3c(c(=O)[nH]2)[nH]c4cc(ccc4c3=O)Cl)OC
615	Cc1ccc(c(c1)C#N)OC(C)(C)[C@H]2OC[C@H]([C@H](O2)c3cccnc3)C/C=C\CCC(=O)O
616	CC(c1cc2ccccc2s1)N(C(=O)N)O
617	CN(C)C/C=C(/c1ccc(cc1)Br)\c2cccnc2
618	c1cc2c(cc1Cl)nc(o2)N
1	CC(C)[C@H](NC(=O)N(C)CC1=CSC(=N1)C(C)C)C(=O)N[C@H](C[C@H](O)[C@H](CC1=CC=CC=C1)NC(=O)OCC1=CN=CS1)CC1=CC=CC=C1
2	[H][C@@](O)(CN1C[C@@]2([H])CCCC[C@@]2([H])C[C@@]1([H])C(O)=NC(C)(C)C)[C@]([H])(CC1=CC=CC=C1)N=C(O)[C@]([H])(CC(O)=N)NC(=O)C1=NC2=CC=CC=C2C=C1
3	[H][C@@]12CCCC[C@]1([H])CN(C[C@@H](O)[C@H](CSC1=CC=CC=C1)NC(=O)C1=C(C)C(O)=CC=C1)[C@@H](C2)C(=O)NC(C)(C)C
4	CC(C)[C@H](N1CCCNC1=O)C(=O)N[C@H](C[C@H](O)[C@H](CC1=CC=CC=C1)NC(=O)COC1=C(C)C=CC=C1C)CC1=CC=CC=C1
5	CC(C)(C)NC(=O)[C@@H]1CN(CC2=CN=CC=C2)CCN1C[C@@H](O)C[C@@H](CC1=CC=CC=C1)C(=O)N[C@@H]1[C@H](O)CC2=CC=CC=C12
6	CCC(C)N1N=CN(C1=O)C1=CC=C(C=C1)N1CCN(CC1)C1=CC=C(OC[C@H]2CO[C@@](CN3C=NC=N3)(O2)C2=C(Cl)C=C(Cl)C=C2)C=C1
7	COC1=C(C=C(Cl)C=C1)C(=O)NCCC1=CC=C(C=C1)S(=O)(=O)NC(=O)NC1CCCCC1
8	CN(C1=CC2=NN(C)C(C)=C2C=C1)C1=CC=NC(NC2=CC=C(C)C(=C2)S(N)(=O)=O)=N1
9	CS(=O)(=O)CCNCC1=CC=C(O1)C1=CC2=C(C=C1)N=CN=C2NC1=CC(Cl)=C(OCC2=CC(F)=CC=C2)C=C1
10	COC1=C(OCCCN2CCOCC2)C=C2C(NC3=CC(Cl)=C(F)C=C3)=NC=NC2=C1
11	CC[C@H]1OC(=O)[C@H](C)[C@@H](O[C@H]2C[C@@](C)(OC)[C@@H](O)[C@H](C)O2)[C@H](C)[C@@H](O[C@@H]2O[C@H](C)C[C@@H]([C@H]2O)N(C)C)[C@](C)(O)C[C@@H](C)C(=O)[C@H](C)[C@@H](O)[C@]1(C)O
12	O=C(C(C(C([H])([H])[H])([H])C([H])([H])[H])([H])OC(C(C(C([H])([H])[H])([H])C([H])([H])[H])([H])N([H])C1=O)=O)N([H])C(C(OC(C([H])([H])[H])([H])C(N([H])C(C(OC(C(N([H])C(C(OC(C([H])([H])[H])([H])C(N([H])C(C(OC(C(N([H])C(C(OC1([H])C([H])([H])[H])=O)([H])C(C([H])([H])[H])([H])C([H])([H])[H])=O)([H])C(C([H])([H])[H])([H])C([H])([H])[H])=O)([H])C(C([H])([H])[H])([H])C([H])([H])[H])=O)=O)([H])C(C([H])([H…
13	[H][C@@]12[C@@H](C)C(=O)[C@H](C)C[C@@](C)(OC)[C@H](O[C@@H]3O[C@H](C)C[C@@H]([C@H]3O)N(C)C)[C@@H](C)C(=O)[C@@H](C)C(=O)O[C@H](CC)[C@@]1(C)OC(=O)N2CCCCN1C=NC(=C1)C1=CC=CN=C1
14	O=C1[C@](C([H])([H])[C@@]2([H])OC(C([H])([H])[H])=O)(C([H])([H])[H])[C@](C([H])([H])C1([H])[H])([H])C(C3=O)=C2[C@]4(C([H])([H])[H])C5=C3OC([H])=C5C(O[C@]4([H])C([H])([H])OC([H])([H])[H])=O
15	CN[C@@H]1C[C@@H]2O[C@]([C@@H]1OC)(N3C4=C(C5=C3C6=C(C7=C5CNC7=O)C8=C(N26)C=CC=C8)C=CC=C4)C
16	CC(C)N=C1C=C2N(C3=CC=C(Cl)C=C3)C3=C(C=CC=C3)N=C2C=C1NC1=CC=C(Cl)C=C1
17	O[C@@H]1CC[C@@]2(C)[C@@]([H])(CC[C@@]3(C)[C@@]2([H])[C@H](O)C[C@@]2([H])\C([C@@H](OC(=O)C)C[C@]32C)=C(/CCC=C(C)C)C(O)=O)[C@@H]1C
18	ClC1=C([H])C2=C(C([H])=C1[H])C([H])=C([H])C(/C([H])=C([H])/C3=C([H])C(C(SC([H])([H])C([H])([H])C(O[H])=O)([H])SC([H])([H])C([H])([H])C(N(C([H])([H])[H])C([H])([H])[H])=O)=C([H])C([H])=C3[H])=N2
19	[H][C@@]12CC[C@@](O)(C#C)[C@@]1(C)CC[C@]1([H])C3=C(CC[C@@]21[H])C=C(O)C=C3
20	[H][C@]12[C@H](OC(=O)C3=CC=CC=C3)[C@]3(O)C[C@H](OC(=O)[C@H](O)[C@@H](NC(=O)C4=CC=CC=C4)C4=CC=CC=C4)C(C)=C([C@@H](OC(C)=O)C(=O)[C@]1(C)[C@@H](O)C[C@H]1OC[C@@]21OC(C)=O)C3(C)C
21	CC(C)OC(=O)C(C)(C)OC1=CC=C(C=C1)C(=O)C1=CC=C(Cl)C=C1
22	C(C=CC1=CC=CC=C1)N1CCN(CC1)C(C1=CC=CC=C1)C1=CC=CC=C1
23	CCCC1=NC2=C(C=C(C=C2C)C2=NC3=CC=CC=C3N2C)N1CC1=CC=C(C=C1)C1=CC=CC=C1C(O)=O
24	BrC1=C([H])C(C(C2=C(C([H])([H])C([H])([H])[H])OC3=C([H])C([H])=C([H])C([H])=C23)=O)=C([H])C(Br)=C1O[H]
25	[H][C@]12[C@H](C[C@@H](C)C=C1C=C[C@H](C)[C@@H]2CC[C@@H]1C[C@@H](O)CC(=O)O1)OC(=O)C(C)(C)CC
26	CO[C@H]1\C=C\O[C@@]2(C)OC3=C(C2=O)C2=C(O)C(\C=N\N4CCN(C)CC4)=C(NC(=O)\C(C)=C/C=C/[C@H](C)[C@H](O)[C@@H](C)[C@@H](O)[C@@H](C)[C@H](OC(C)=O)[C@@H]1C)C(O)=C2C(O)=C3C
27	CO[C@H]1\C=C\O[C@@]2(C)OC3=C(C2=O)C2=C(C(O)=C3C)C(=O)C(NC(=O)\C(C)=C/C=C/[C@H](C)[C@H](O)[C@@H](C)[C@@H](O)[C@@H](C)[C@H](OC(C)=O)[C@@H]1C)=C1NC3(CCN(CC3)CC(C)C)N=C21
28	CCN(CC)CC#CCOC(=O)C(O)(C1CCCCC1)C1=CC=CC=C1
29	[H][C@@]12CC[C@H](C(=O)NC(C)(C)C)[C@@]1(C)CC[C@@]1([H])[C@@]2([H])CC[C@@]2([H])NC(=O)C=C[C@]12C
30	CCOC(=O)NC1=C(N)N=C(NCC2=CC=C(F)C=C2)C=C1
31	CC(C)N1C(\C=C\[C@@H](O)C[C@@H](O)CC(O)=O)=C(C2=CC=CC=C12)C1=CC=C(F)C=C1
32	CCOC1=C(OCC)C=C(\C=C2/NCCC3=CC(OCC)=C(OCC)C=C23)C=C1
33	CC1(CCCCC1)COC2=CC=C(C=C2)CC3C(NC(S3)=O)=O
34	CC1=NC=C2CN=C(C3=CC=CC=C3F)C3=C(C=CC(Cl)=C3)N12
35	COC1=C(C)C(C)=C(\C=C\C(\C)=C\C=C\C(\C)=C\C(O)=O)C(C)=C1
36	ClC1(C(C(C([H])=C2[H])=C([H])C([H])=C2OC(C([H])([H])[H])(C(O[H])=O)C([H])([H])[H])([H])C1([H])[H])Cl
37	[H][C@]12SC(C)(C)[C@@H](N1C(=O)[C@H]2NC(=O)C1=C(C)ON=C1C1=C(Cl)C=CC=C1Cl)C(O)=O
38	[H][C@](N)(C(O)=O)C(C)(C)S
39	NC(N)=NC1=NC(CSCCC(N)=NS(N)(=O)=O)=CS1
40	[O-][N+](=O)C1=CC=C(O1)\C=N\N1CC(=O)NC1=O
41	CN1CC(C2=CC=CC=C2)C2=C(C1)C(N)=CC=C2
42	CN\C(NCCSCC1=CC=C(CN(C)C)O1)=C/[N+]([O-])=O
43	CN1CCN(CC1)/N=C/C2=C(NC3=O)C(O)=C4C(O)=C(C)C(O[C@@](O/C=C/[C@H](OC)[C@@H](C)[C@@H](OC(C)=O)[C@H](C)[C@H](O)[C@H](C)[C@@H](O)[C@@H](C)/C=C/C=C3/C)(C)C5=O)=C5C4=C2O
44	CCCC(CCC)C(O)=O
45	ClCCNC(=O)N(CCCl)N=O
46	IC1=C([H])N(C(N([H])C1=O)=O)[C@]2([H])O[C@@](C([H])([H])O[H])([H])[C@@]([C@]2([H])F)([H])O[H]
47	CN(CC1=CN=C2N=C(N)N=C(N)C2=N1)C1=CC=C(C=C1)C(=O)N[C@@H](CCC(O)=O)C(O)=O
48	OC(=O)C1=CC=CC=C1O
49	[H][C@]12SC(C)(C)[C@@H](N1C(=O)[C@H]2NC(=O)[C@H](N)C1=CC=C(O)C=C1)C(O)=O
50	[H][C@@]12C[C@H](C)[C@](OC(=O)CC)(C(=O)CCl)[C@@]1(C)C[C@H](O)[C@@]1(F)[C@@]2([H])CCC2=CC(=O)C=C[C@]12C
51	[H][C@]12N(C)CC[C@@]1(C)C1=C(C=CC(OC(=O)NC)=C1)N2C
52	O=C(C(C([H])=C(C(N([H])C([H])([H])C1=C([H])N=C([H])C([H])=C1[H])=O)C([H])=C2[H])=C2OC([H])([H])[H])N([H])C([H])([H])C3=C([H])N=C([H])C([H])=C3[H]
53	N#CN([H])/C(N([H])C1=C([H])C([H])=NC([H])=C1[H])=N\C(C([H])([H])[H])([H])C(C([H])([H])[H])(C([H])([H])[H])C([H])([H])[H]
54	CC1=C(O)C(CO)=C(CO)C=N1
55	CN[C@H]1[C@H](O)[C@@H](O)[C@H](CO)O[C@H]1O[C@H]1[C@H](O[C@H]2[C@H](O)[C@@H](O)[C@H](NC(N)=N)[C@@H](O)[C@@H]2NC(N)=N)O[C@@H](C)[C@]1(O)C=O
