# Supplementary material for: The in silico identification of human bile salt export pump (ABCB11) inhibitors associated with cholestatic drug-induced liver injury
Source: Royal Society of Chemistry journal article supplement (doi:10.1039/c6mb00744a), 2017-01-05
Supplement: c6mb00744a2.xlsx [file c6mb00744a2.xlsx]

## Sheet: Supplymentory_Table_S1
Tabel S1 Detail Information of the training set, test and external test sets. (a: compounds in the training set for developming HipHop pharmacophore model.)
ID	Name	Exp. Class	Pred. prob	Pred. class	Data set	MLOGP	RTp	HTp	Mor01m	WiA_B.s.	RDF045u	Eig07_AEA.ed.
1a	1,3-BIS( 2-CHLOROETHYL)-N-NITROSOUREA	POS	0.0622	NEG	Test	0.812	6.042	5.59	143.791	0.637	5.498	1.451
2	4-AMINO BUTYLBENZOATE	POS	0.0978	NEG	Training	2.378	6.077	5.984	121.475	0.478	9.469	2
3	4-CHLORO-3,5-DIMETHYLPHENOL	POS	0.2708	NEG	Training	2.778	5.163	4.456	75.756	0.665	5.135	1.468
4	5-FLUOROURACIL	NEG	0.0093	NEG	Training	-0.234	2.76	2.343	52.265	0.99	4.137	1.28
5	8-HYDROXY QUINOLINE	NEG	0.1601	NEG	Training	1.964	4.244	3.973	66.96	0.615	5.126	2
6	A-967079	POS	0.3141	NEG	Training	3.278	7.399	6.598	140.052	0.474	14.089	2.618
7	ACEPROMAZINE	POS	0.9936	POS	Training	3.085	11.58	12.944	354.14	0.276	19.804	3.932
8	ACETAMINOPHEN	NEG	0.0313	NEG	Training	1.06	5.475	4.315	72.739	0.661	7.689	1.704
9	ACETANILIDE	NEG	0.0633	NEG	Training	1.628	5.514	4.269	57.745	0.67	5.748	1.309
10	ACETYL CHOLINE	NEG	0.0264	NEG	Training	-2.793	6.47	4.984	68.122	0.629	7.765	1.52
11	ACNECLEAR	POS	0.9851	POS	Training	4.9	14.333	15.27	571.568	0.273	29.795	4.181
12	ACTARIT	NEG	0.0604	NEG	Training	1.331	6.55	5.562	121.034	0.546	11.074	2.295
13	ACYCLOVIR	NEG	0.0587	NEG	Training	0.041	6.541	5.978	165.757	0.467	12.306	2.851
14	ADENINE	NEG	0.0056	NEG	Test	0.582	3.331	3.061	57.396	0.689	7.583	1.841
15	ADIPHENINE	POS	0.8344	POS	Training	3.856	11.54	12.024	323.727	0.277	20.729	3.406
16	ALBUTEROL	NEG	0.04	NEG	Test	1.133	8.074	7.834	188.67	0.406	13.691	2.863
17a	ALMOKALANT	POS	0.6056	NEG	Test	1.687	10.847	12.843	414.162	0.28	35.824	3.414
18	ALPHA-METHYLDOPA	NEG	0.012	NEG	Training	0.491	7.337	6.038	145.404	0.532	12.173	2.382
19a	ALPIDEM	POS	0.9787	POS	Training	4.445	12.911	15.16	544.592	0.247	34.154	4.397
20	ALTRETAMINE	NEG	0.2128	NEG	Training	2.224	6.407	6.248	144.703	0.409	14.881	2.268
21	Erlotinib	POS	0.8209	POS	Training	2.902	10.289	12.789	520.022	0.232	23.849	3.977
22	AMILORIDE	NEG	0.0355	NEG	Training	0.262	6.243	5.825	169.795	0.537	5.763	2.64
23	AMINOGLUTETHIMIDE	NEG	0.0611	NEG	Test	1.377	8.683	7.595	177.384	0.416	20.326	3.414
24	AMINOHIPPURIC ACID	NEG	0	NEG	Training	0.508	5.921	5.175	122.186	0.565	7.81	2
25	AMIODARONE	POS	0.9356	POS	Training	5.106	17.731	24.351	1316.1	0.205	30.222	4.879
26a	AMLODIPINE	POS	0.8322	POS	Test	1.641	11.316	12.815	559.398	0.253	31.851	4.04
27	AMODIAQUINE	POS	0.9915	POS	Training	3.454	13.162	13.929	421.713	0.262	27.232	4.175
28	AMOXAPINE	POS	0.7524	POS	Training	2.732	11.378	11.332	325.521	0.291	18.458	3.887
29	AMRINONE	NEG	0	NEG	Test	0.312	6.607	5.469	113.542	0.505	7.57	2.592
30	ANTAZOLINE	NEG	0.4528	NEG	Training	3.035	10.478	10.293	233.539	0.304	17.349	3.316
31	ANTIPYRINE	NEG	0.1089	NEG	Test	2.306	7.553	6.283	115.053	0.472	9.767	2.673
32	APOMORPHINE	POS	0.2698	NEG	Training	2.571	9.636	9.04	236.752	0.332	12.393	4.247
33	ARC 68475AA	POS	0.9077	POS	Training	0.993	12.24	16.721	727.422	0.231	22.832	3.945
34	ARECOLINE	NEG	0.0057	NEG	Training	0.725	5.584	4.619	77.016	0.583	4.495	1.69
35	ARH047108	POS	0.8644	POS	Test	2.733	10.845	11.985	378.771	0.266	27.596	4.377
36	ARM 390	POS	0.9767	POS	Test	3.905	12.124	13.644	407.233	0.241	30.991	3.642
37	Sorafenib	POS	0.9184	POS	Training	2.279	12.121	14.426	725.023	0.255	16.02	4.965
38	Dexamethasone	POS	0.9446	POS	Training	1.855	12.526	13.004	517.262	0.268	57.455	5.281
39	ASPARTAME	NEG	0.1368	NEG	Training	-1.634	9.169	9.062	287.455	0.371	25.525	3.438
40	ASTEMIZOLE	POS	0.9139	POS	Training	4.629	13.094	16.731	710.165	0.192	40.229	5.057
41	AZ1	NEG	0.0056	NEG	Test	1.019	6.034	5.275	122.186	0.565	8.785	2
42	AZ10	POS	0.9379	POS	Training	2.512	13.714	19.304	987.144	0.168	30.661	5.189
43	AZ100	POS	0.9978	POS	Test	4.662	12.464	14.321	491.422	0.237	24.287	4.303
44	AZ101	NEG	0.3456	NEG	Test	-0.26	9.899	9.497	381.909	0.334	34.817	4.252
45a	AZ102	POS	0.8895	POS	Training	2.642	12.417	12.848	475.498	0.269	54.418	4.931
46	AZ103	POS	1	POS	Training	3.483	13.086	14.738	696.603	0.246	42.008	4.673
47	AZ104	NEG	0.129	NEG	Training	1.419	10.966	10.544	306.265	0.305	24.346	3.919
48	AZ105	POS	1	POS	Test	2.538	12.409	14.77	606.872	0.231	44.725	4.279
49	AZ106	NEG	0.1916	NEG	Training	0.227	8.207	8.291	287.547	0.339	23.43	4.074
50	AZ107	NEG	0.268	NEG	Training	0.767	9.376	10.14	387.034	0.315	24.415	4.143
51	AZ108	POS	0.9539	POS	Training	4.093	15.841	21.155	1076.27	0.177	77.351	4.917
52	AZ109	POS	0.9076	POS	Training	1.582	12.381	14.007	716.606	0.225	34.677	5.027
53	AZ11	POS	0.9586	POS	Training	2.719	11.635	13.982	768.003	0.282	19.418	4.881
54	AZ110	NEG	0.6012	NEG	Training	1.359	11.785	13.156	672.896	0.235	30.836	5.039
55	AZ111	NEG	0.2201	NEG	Training	1.933	8.896	9.817	393.286	0.295	13.907	4.596
56	AZ112	NEG	0.2395	NEG	Training	-4.304	8.561	8.496	395.213	0.368	31.59	3.793
57	AZ113	NEG	0.4838	NEG	Training	2.686	8.324	9.193	258.742	0.364	16.561	3.354
58	AZ114	POS	1	POS	Training	1.948	12.178	15.689	664.358	0.224	33.01	4.697
59	AZ115	NEG	0.2822	NEG	Test	-3.415	5.543	6.157	226.595	0.418	6.458	3.522
60	AZ116	POS	1	POS	Training	2.175	12.817	17.692	769.78	0.22	27.073	3.952
61	AZ117	POS	0.9883	POS	Training	2.581	13.085	15.634	798.186	0.235	35.697	5.241
62	AZ118	POS	0.997	POS	Training	3.691	12.877	15.121	511.352	0.236	23.537	4.911
63	AZ119	NEG	0.5978	NEG	Training	1.446	9.798	12.872	545.708	0.269	16.959	4.106
64	AZ12	POS	0.9689	POS	Test	3.531	15.345	21.157	961.633	0.17	29.108	5.191
65	AZ120	POS	0.9711	POS	Training	3.075	15.008	17.02	646.095	0.199	41.734	5.061
66	AZ121	POS	0.9177	POS	Training	3.263	11.196	11.952	397.048	0.265	29.424	4.598
67	AZ122	POS	0.7393	POS	Training	1.43	11.575	13.815	573.297	0.255	25.172	4.892
68	AZ123	POS	0.8098	POS	Training	0.471	17.056	23.616	1459.4	0.159	104.179	4.893
69	AZ124	POS	0.8997	POS	Training	1.948	10.911	14.231	664.358	0.223	32.635	4.511
70	AZ125	POS	0.9707	POS	Training	1.948	11.563	14.664	664.358	0.224	43.933	4.785
71	AZ126	POS	0.7589	POS	Test	3.852	10.967	11.706	532.278	0.275	25.793	4.913
72	AZ127	POS	0.696	POS	Training	1.064	11.811	14.444	588.168	0.265	23.863	4.803
73	AZ128	POS	0.9527	POS	Training	3.531	11.675	12.689	443.384	0.271	26.798	4.598
74	AZ129	POS	0.9658	POS	Training	3.791	12.106	12.329	315.555	0.258	17.509	3.834
75	AZ13	POS	0.9678	POS	Test	3.328	12.066	12.632	347.109	0.365	13.138	4.038
76	AZ130	POS	0.994	POS	Training	3.164	12.811	13.558	358.72	0.262	29.753	4.136
77	AZ131	POS	0.4864	NEG	Training	1.447	6.48	7.517	328.188	0.35	11.395	4.167
78	AZ132	NEG	0.047	NEG	Training	0.595	8.493	8.806	295.494	0.381	22.511	3.724
79	AZ133	NEG	0.0203	NEG	Training	1.272	7.487	5.991	84.855	0.474	10.451	2.28
80	AZ134	POS	0.991	POS	Training	2.382	12.949	15.907	700.251	0.204	34.252	4.915
81	AZ135	NEG	0.0189	NEG	Training	-0.46	7.458	6.295	137.292	0.532	17.999	2
82	AZ136	NEG	0.5414	NEG	Training	0.484	14.305	18.196	1413.48	0.229	39.159	5.3
83	AZ137	POS	0.9845	POS	Training	4.11	13.458	16.839	589.131	0.217	27.015	4.987
84	AZ138	NEG	0.0444	NEG	Test	1.133	8.008	7.79	188.67	0.406	14.991	2.863
85	AZ139	POS	0.9978	POS	Test	2.57	13.212	17.1	668.48	0.214	24.447	4.76
86	AZ14	POS	0.8182	POS	Training	3.93	10.264	10.532	453.894	0.342	16.795	4.759
87	AZ140	POS	0.9879	POS	Training	2.362	11.566	15.542	626.284	0.222	20.199	4.739
88	AZ141	POS	0.7768	POS	Training	0.036	18.559	26.188	1908.44	0.133	123.801	5.815
89	AZ142	POS	0.9812	POS	Training	3.661	12.329	17.227	898.953	0.211	31.175	5.048
90	AZ143	POS	0.9567	POS	Training	1.344	11.583	14.732	737.399	0.236	23.022	4.307
91	AZ144	POS	1	POS	Training	2.671	12.64	14.623	576.203	0.234	37.943	4.592
92	AZ145	POS	0.9335	POS	Training	4.227	11.363	11.813	321.77	0.272	37.793	4.469
93	AZ146	NEG	0.0756	NEG	Test	-6.446	13.643	17.483	1286.71	0.185	85.715	5.722
94	AZ147	POS	0.9224	POS	Training	1.747	12.332	13.016	470.678	0.264	55.099	5
95	AZ148	NEG	0.3261	NEG	Training	-0.605	15.055	18.685	1159.9	0.182	94.527	5.833
96	AZ149	NEG	0.71	POS	Test	2.117	10.8	12.826	416.226	0.282	26.245	3.621
97	AZ15	POS	0.9514	POS	Training	4.513	12.366	13.83	419.233	0.241	23.809	3.669
98	AZ150	POS	0.3967	NEG	Test	0.866	12.16	12.458	522.255	0.278	57.058	5.281
99	AZ151	POS	0.9642	POS	Training	3.414	10.984	11.699	460.156	0.34	18.594	4.409
100	AZ152	POS	0.994	POS	Training	4.154	12.636	12.943	381.299	0.253	47.471	4.88
101	AZ153	POS	0.9942	POS	Training	3.793	12.01	14.655	560.229	0.23	30.821	4.643
102	AZ154	POS	0.9942	POS	Training	2.899	11.914	13.765	549.668	0.255	26.074	4.349
103	AZ155	POS	0.9968	POS	Training	3.6	12.088	14.262	500.523	0.239	29.569	4.524
104	AZ156	POS	0.9093	POS	Training	2.806	11.528	13.837	546.163	0.28	12.988	4.229
105	AZ157	POS	0.8807	POS	Training	0.567	20.974	30.082	2313.12	0.124	121.384	6.023
106a	AZ158	POS	1	POS	Training	2.478	13.081	15.834	648.342	0.223	47.136	4.377
107	AZ159	POS	1	POS	Test	3.204	14.545	15.496	738.59	0.254	29.313	4.907
108	AZ16	POS	0.9533	POS	Test	3.221	13.898	19.417	914.393	0.175	28.53	5.189
109	AZ160	NEG	0.173	NEG	Training	-0.875	12.343	13.257	665.288	0.255	38.236	5.366
110	AZ161	NEG	0.1491	NEG	Training	2.207	10.849	10.461	278.419	0.311	18.169	3.8
111	AZ162	NEG	0.2878	NEG	Test	1.964	10.398	10.012	251.457	0.33	20.559	3.747
112	AZ163	POS	0.9967	POS	Test	4.113	14.586	17.136	670.839	0.225	29.17	4.539
113	AZ164	NEG	0.5778	NEG	Test	0.74	13.584	16.618	1011.14	0.21	34.724	5.035
114	AZ165	NEG	0.1822	NEG	Test	-5.915	15.475	19.923	1599.99	0.17	85.774	5.287
115	AZ167	NEG	0.1789	NEG	Training	-5.199	13.286	16.247	1146.77	0.201	81.722	5.793
116	AZ168	NEG	0.5385	NEG	Training	1.85	6.392	4.82	56.293	0.588	4.2	1.859
117	AZ169	NEG	0.3939	NEG	Training	2.794	8.691	6.738	90.804	0.431	17.805	3
118	AZ17	NEG	0.8563	POS	Training	2.504	11.657	11.331	288.677	0.287	25.931	4.121
119	AZ170	POS	0.8767	POS	Test	2.254	11.33	12.359	420.988	0.251	32.12	4.88
120	AZ171	NEG	0.1441	NEG	Training	2.207	10.849	10.461	278.419	0.311	18.172	3.8
121a	AZ172	POS	0.7267	POS	Test	1.765	10.348	12.09	418.787	0.252	24.092	4.835
122	AZ173	NEG	0.6311	POS	Training	-1.881	13.362	14.063	513.252	0.258	29.909	5.184
123	AZ174	NEG	0.7774	POS	Training	1.841	12.427	11.918	389.81	0.27	33.816	5.302
124	AZ175	NEG	0.2467	NEG	Training	0.171	6.768	6.08	289.593	0.459	15.57	4.153
125	AZ176	POS	0.9465	POS	Training	4.067	12.875	14.345	518.719	0.23	68.103	4.944
126	AZ177	NEG	0.6401	POS	Training	1.527	11.911	11.353	357.788	0.289	31.205	4.643
127	AZ178	POS	0.9368	POS	Training	2.74	12.709	12.6	619.633	0.315	34.027	4.793
128	AZ179	NEG	0.3089	NEG	Training	2.384	9.293	9.088	200.615	0.344	19.38	3.561
129	AZ18	POS	0.852	POS	Training	3.895	14.591	21.022	1070.59	0.162	32.386	5.447
130	AZ180	POS	1	POS	Training	2.888	14.406	16.081	747.413	0.215	59.141	4.662
131	AZ181	NEG	0.9853	POS	Training	2.43	11.245	13.295	455.831	0.265	34.417	3.771
132	AZ182	NEG	0.0884	NEG	Training	1.062	11.267	11.098	406.08	0.311	28.593	4.638
133	AZ183	NEG	0.3032	NEG	Training	0.581	11.972	11.703	444.842	0.311	30.553	4.85
134	AZ184	NEG	0.9056	POS	Test	-0.139	18.944	25.821	1836.86	0.138	148.381	5.787
135	AZ185	POS	0.9188	POS	Training	2.192	11.679	12.138	351.706	0.266	33.272	4.408
136	AZ186	NEG	0.4741	NEG	Training	0.827	11.397	14.829	750.584	0.211	43.464	5.088
137	AZ187	POS	0.8801	POS	Training	1.528	12.26	12.471	435.438	0.276	53.022	4.832
138	AZ188	POS	0.975	POS	Training	1.618	12.368	12.688	440.494	0.272	43.347	4.832
139	AZ189	POS	0.7874	POS	Training	4.004	11.335	11.276	292.761	0.295	34.865	4.465
140	AZ19	NEG	0.3545	NEG	Training	1.869	9.465	9.198	251.502	0.322	28.083	4.214
141	AZ190	POS	0.9456	POS	Training	3.214	12.006	12.27	365.396	0.271	43.291	4.737
142	AZ191	POS	0.7138	POS	Training	4.215	9.961	10.723	697.467	0.317	27.86	4.954
143	AZ192	NEG	0.6045	NEG	Training	0.142	11.8	13.457	688.112	0.272	20.004	4.777
144	AZ193	NEG	0.2012	NEG	Training	2.329	7.136	6.094	142.994	0.451	8.479	2.956
145	AZ194	POS	0.946	POS	Training	2.264	21.407	30.94	2451.85	0.117	134.065	6.262
146	AZ195	POS	0.6395	POS	Training	-0.345	15.096	19.209	789.954	0.199	31.574	4.537
147	AZ196	POS	0.8517	POS	Training	3.827	11.638	11.577	296.919	0.292	42.586	4.465
148	AZ197	NEG	0.4075	NEG	Training	0.596	11.421	12.433	437.789	0.277	33.063	4.092
149	AZ198	POS	0.7085	POS	Training	2.038	10.904	13.886	746.539	0.215	29.767	5.19
150a	AZ199	POS	0.9278	POS	Test	4.941	11.615	15.317	560.745	0.24	20.353	3.5
151	AZ2	NEG	0.2918	NEG	Training	1.968	5.934	5.173	73.563	0.751	3.64	1.476
152	AZ20	NEG	0.9067	POS	Test	0.143	20.438	27.406	1914.03	0.131	153.039	5.745
153	AZ200	POS	0.9879	POS	Training	5.355	11.866	16.282	801.941	0.203	27.664	4.879
154	AZ201	NEG	0.3756	NEG	Test	3.041	10.514	9.854	274.478	0.306	37.028	3.732
155	AZ21	POS	0.9905	POS	Training	2.271	11.819	14.45	636.656	0.249	26.947	4.306
156	AZ22	POS	0.6603	POS	Training	1.375	11.393	14.084	685.028	0.242	26.828	4.307
157	AZ23	NEG	0.021	NEG	Training	1.646	7.796	7.152	159.082	0.431	12.88	2.46
158	AZ24	NEG	0.0714	NEG	Training	0.892	8.53	9.316	379.676	0.303	22.232	4.04
159	AZ25	POS	0.8862	POS	Training	1.117	11.52	14.496	692.968	0.247	23.212	4.306
160	AZ26	NEG	0.0033	NEG	Test	-0.329	4.632	3.32	52.422	0.782	7.274	1
161	AZ27	POS	0.6609	POS	Training	1.509	12.103	13.14	574.608	0.228	38.712	5.27
162	AZ28	POS	0.9889	POS	Test	1.567	13.462	16.422	786.277	0.229	35.914	4.73
163	AZ29	NEG	0.0295	NEG	Training	1.294	7.622	5.97	97.073	0.532	15.58	2.486
164	AZ3	POS	0.9939	POS	Training	2.27	13.145	16.605	857.251	0.226	26.743	4.995
165	AZ30	POS	0.2844	NEG	Training	2.873	5.619	6.698	180.505	0.366	8.75	3.61
166	AZ31	NEG	0.1175	NEG	Training	1.651	6.703	6.576	184.883	0.426	11.53	2.734
167	AZ32	POS	0.9956	POS	Test	2.985	12.786	14.103	545.251	0.243	52.137	4.958
168	AZ33	POS	0.8163	POS	Training	3.204	9.795	9.813	304.364	0.326	23.38	4.3
169	AZ34	POS	0.9989	POS	Test	2.271	12.989	14.968	636.656	0.249	38.461	4.306
170	AZ35	POS	0.0086	NEG	Training	1.315	5.203	4.358	144.55	0.623	3.875	2.268
171	AZ36	NEG	0.1701	NEG	Training	1.869	9.105	10.6	382.733	0.291	22.437	3.688
172	AZ37	POS	0.997	POS	Training	2.231	12.83	14.304	635.894	0.243	63.686	5.272
173	AZ38	POS	0.9436	POS	Training	3.478	11.546	13.559	516.349	0.282	16.004	4.098
174	AZ39	NEG	0.1371	NEG	Training	2.452	9.307	8.973	195.524	0.344	16.881	3.24
175	AZ4	NEG	0.2875	NEG	Training	2.291	9.111	10.171	364.124	0.279	16.367	3.788
176a	AZ40	POS	0.9415	POS	Training	3.449	11.292	15.113	728.469	0.197	26.409	4.81
177	AZ41	POS	0.9833	POS	Test	2.039	12.791	12.973	493.049	0.243	41.108	4.813
178	AZ42	NEG	0.0111	NEG	Test	0.793	6.174	5.243	89.941	0.569	6.469	2
179	AZ43	POS	0.9971	POS	Training	2.225	12.061	15.217	687.092	0.242	22.99	4.306
180	AZ44	NEG	0.7537	POS	Training	2.571	9.646	9.133	236.752	0.332	15.561	4.247
181	AZ45	POS	0.1767	NEG	Training	2.864	7.418	6.966	153.349	0.403	19.13	2.85
182	AZ46	NEG	0.1917	NEG	Training	1.223	10.371	11.118	331.662	0.303	21.513	3.35
183	AZ47	NEG	0.116	NEG	Training	1.83	6.031	5.167	127.578	0.659	4.604	2.265
184	AZ48	NEG	0.1746	NEG	Training	1.358	10.185	10.858	319.118	0.306	23.322	3.695
185	AZ49	POS	0.9722	POS	Test	1.263	11.848	14.883	690.027	0.245	22.784	4.306
186	AZ5	POS	0.9211	POS	Training	1.263	11.773	14.862	690.027	0.245	24.27	4.306
187	AZ50	POS	0.9644	POS	Test	3.992	11.098	12.319	473.885	0.303	19.171	4.385
188	AZ51	NEG	0.1635	NEG	Training	1.205	9.05	10.74	562.53	0.275	27.067	4.814
189	AZ52	POS	0.7121	POS	Training	2.763	10.548	11.003	344.679	0.351	16.615	4.084
190	AZ53	POS	0.8224	POS	Training	1.875	10.535	13.147	570.174	0.256	25.524	4.862
191	AZ54	NEG	0.3123	NEG	Training	1.93	9.018	10.748	510.657	0.314	19.807	4.562
192	AZ55	POS	0.9576	POS	Training	1.486	12.763	15.551	737.342	0.237	33.348	4.73
193	AZ56	POS	0.9818	POS	Training	3.082	11.723	12.086	349.173	0.369	17.089	4.038
194	AZ57	POS	0.9909	POS	Training	3.028	11.555	12.542	443.393	0.314	22.118	4.399
195	AZ58	NEG	0.3275	NEG	Training	1.311	11.277	13.584	696.096	0.238	32.801	4.973
196	AZ59	POS	0.5891	NEG	Training	2.483	9.878	11.647	488.845	0.255	11.188	4.334
197	AZ6	POS	0.9459	POS	Training	3.583	11.304	11.899	371.671	0.343	16.786	4.129
198	AZ60	POS	0.9877	POS	Training	4.279	12.014	13.542	450.576	0.247	31.969	3.862
199	AZ61	NEG	0.0401	NEG	Training	1.544	8.219	7.116	141.698	0.433	13.414	2.91
200	AZ62	NEG	0.0211	NEG	Training	-3.601	6.534	4.938	84.343	0.66	5.515	2
201	AZ63	POS	0.9667	POS	Test	2.429	11.493	15.382	709.708	0.21	37.759	4.659
202	AZ64	NEG	0.1945	NEG	Training	0.096	5.028	4.776	185.467	0.502	7.522	3.254
203	AZ65	POS	0.9878	POS	Training	4.35	14.399	17.445	751.941	0.2	34.381	4.929
204	AZ66	NEG	0.1478	NEG	Training	0.658	8.595	9.492	327.251	0.326	18.689	3.281
205	AZ67	POS	0.1302	NEG	Training	1.807	9.601	9.248	198.732	0.366	16.127	3.099
206	AZ68	NEG	0.1169	NEG	Training	0.821	7.416	7.674	208.109	0.386	12.338	2.955
207	AZ69	NEG	0.0965	NEG	Training	-6.446	14.832	18.437	1282.73	0.183	91.039	5.722
208	AZ7	POS	0.9723	POS	Training	2.166	11.573	13.649	729.127	0.29	18.91	4.428
209	AZ70	NEG	0.0383	NEG	Training	0.563	4.406	3.639	59.452	0.657	2.119	1.461
210	AZ71	POS	0.8947	POS	Training	4.421	15.677	31.658	2115.08	0.115	66.973	3.963
211	AZ72	POS	0.1077	NEG	Training	3.007	8.829	7.892	135.158	0.426	16.527	2.484
212	AZ73	POS	0.9938	POS	Training	3.212	12.434	17.428	882.128	0.196	30.112	4.915
213	AZ74	NEG	0.7333	POS	Test	2.967	9.461	9.376	272.122	0.338	14.758	3.913
214	AZ76	NEG	0.0058	NEG	Training	0.102	5.848	4.897	107.093	0.56	5.417	1.877
215	AZ77	NEG	0.3189	NEG	Training	2.001	9.77	10.471	434.722	0.323	10.71	4.403
216	AZ78	NEG	0	NEG	Training	-0.064	5.739	4.596	91.857	0.636	8.612	2
217	AZ79	NEG	0.1497	NEG	Training	1.305	10.046	10.912	532.561	0.277	14.98	4.944
218	AZ8	POS	0.9766	POS	Training	2.182	13.813	17.584	776.65	0.219	21.955	4.951
219	AZ80	NEG	0.0821	NEG	Training	1.015	9.199	9.261	393.119	0.33	12.491	4.403
220	AZ81	NEG	0.0912	NEG	Training	1.015	9.127	9.416	395.251	0.333	8.138	4.403
221	AZ82	NEG	0.4178	NEG	Test	2.347	8.901	9.426	522.894	0.319	9.635	4.878
222	AZ83	POS	0.8924	POS	Training	1.72	11.801	12.061	462.175	0.266	38.505	4.637
223	AZ84	POS	0.5595	NEG	Training	3.522	8.848	9.253	233.073	0.323	16.182	3.414
224	AZ85	POS	0.9889	POS	Test	2.641	12.11	12.808	440.511	0.264	21.172	4.414
225	AZ86	POS	0.797	POS	Training	4.184	9.659	10.887	344.714	0.282	23.777	4.304
226	AZ87	POS	0.2041	NEG	Training	2.209	7.656	7.219	226.971	0.406	9.914	3.65
227	AZ88	POS	0.0693	NEG	Training	1.432	8.317	8.466	311.916	0.343	12.912	3.871
228	AZ89	NEG	0.0178	NEG	Test	0.531	7.705	6.402	167.498	0.495	20.789	2.612
229	AZ9	POS	0.9769	POS	Training	3.7	11.204	11.822	413.474	0.346	17.242	4.251
230	AZ90	NEG	0.2066	NEG	Training	2.679	7.94	7.276	169.669	0.515	4.803	2.352
231	AZ91	POS	0.0288	NEG	Training	1.85	6.407	4.849	56.293	0.588	3.962	1.859
232	AZ92	POS	0.9911	POS	Test	3.902	14.532	16.416	541.377	0.218	25.296	5.034
233	AZ93	NEG	0.0344	NEG	Test	1.228	8.808	8.849	341.93	0.418	18.002	3.414
234	AZ95	NEG	0.0188	NEG	Training	0.381	6.43	5.643	116.376	0.637	11.429	1.411
235	AZ96	NEG	0.4869	NEG	Training	-5.651	15.475	20.279	1521.35	0.169	91.763	5.275
236	AZ97	POS	0.9971	POS	Training	3.056	11.792	14.185	616.26	0.238	25.049	4.616
237	AZ98	NEG	0.1773	NEG	Training	0.502	11.096	10.918	439.746	0.312	24.227	4.779
238	AZ99	POS	0.4889	NEG	Test	2.464	9.349	9.706	288.2	0.298	17.013	4.144
239	AZATHIOPRINE	NEG	0.3787	NEG	Training	2.223	9.749	8.458	251.921	0.402	19.344	3.671
240	AZD0865	POS	0.9366	POS	Training	2.184	10.595	12.685	450.555	0.25	27.412	4.448
241	AZD-4407	POS	0.9845	POS	Training	2.907	11.452	12.982	468.853	0.266	23.581	4.718
242	AZD7009	NEG	0.9433	POS	Test	1.425	13.262	15.465	497.082	0.231	36.88	4.855
243	BECLOMETHASONE	POS	0.9935	POS	Training	1.962	13.179	13.688	559.86	0.258	54.491	5.281
244	BENDROFLUMETHIAZIDE	POS	0.3156	NEG	Test	1.582	10.39	11.165	591.71	0.327	18.928	4.99
245	BENOXAPROFEN	POS	0.6518	POS	Training	3.621	8.254	9.138	299.866	0.347	9.953	4.231
246	BENOXINATE	NEG	0.4633	NEG	Test	2.615	9.114	10.804	317.222	0.291	16.577	3.296
247	BENSERAZIDE	POS	0.0265	NEG	Training	-1.115	7.229	6.809	217.92	0.451	12.016	2.838
248	BENZOCAINE	NEG	0.1088	NEG	Training	1.783	5.106	4.66	87.62	0.578	8.914	2
249	BENZONATATE	POS	0.6161	POS	Training	-0.077	11.654	20.671	1238.31	0.153	37.515	3.802
250	BENZOYLPAS	NEG	0.3567	NEG	Test	2.726	7.646	7.523	218.148	0.414	8.037	3.443
251	BENZTHIAZIDE	POS	0.79	POS	Test	1.793	11.189	13.154	618.667	0.302	13.749	4.371
252	BENZYLPENICILLIN (PENICILLIN G)	POS	0.5	NEG	Training	1.821	12.202	11.538	371.158	0.323	25.599	4.613
253	BEPRIDIL	POS	0.9378	POS	Test	3.868	14.773	15.723	451.507	0.216	58.624	3.601
254	BETA CAROTENE	POS	0.3467	NEG	Training	8.957	13.194	21.648	979.276	0.146	57.416	4.994
255	BETAINE	NEG	0.0338	NEG	Training	-3.524	5.23	3.46	43.416	0.878	2.596	1
256	BETAXOLOL	NEG	0.2289	NEG	Test	1.991	8.72	10.705	315.286	0.277	15.535	3.414
257	BETHANECHOL	NEG	0.0254	NEG	Training	-3.601	6.514	5.096	83.448	0.599	15.508	2
258	BEZAFIBRATE	POS	0.7851	POS	Training	3.393	10.099	11.992	435.721	0.292	26.755	4.17
259	BISACODYL	POS	0.9867	POS	Test	3.359	11.066	12.519	437.503	0.263	27.914	4.39
260	BISMUTH SUBSALICYLATE	NEG	0.1464	NEG	Training	1.643	3.42	3.08	59.955	0.802	2.404	1.476
261	BOSENTAN	POS	0.9563	POS	Training	2.687	17.301	19.572	1029.11	0.186	58.809	4.897
262	BRETYLIUM	NEG	0.1794	NEG	Training	-0.161	9.683	8.613	176.641	0.433	12.197	2
263	BROMHEXINE	POS	0.8679	POS	Training	3.933	11.493	12.537	437.799	0.324	15.553	3.247
264	BUMETANIDE	NEG	0.5994	NEG	Training	1.763	10.829	11.681	442.515	0.305	25.649	3.684
265	BUPHENINE	POS	0.7578	POS	Test	3.164	10.777	11.607	298.794	0.296	31.444	3.465
266	BUPROPION	NEG	0.543	NEG	Training	3.218	9.859	9.192	186.797	0.409	19.44	2.761
267	BUSPIRONE	POS	0.9989	POS	Test	2.209	12.898	14.482	499.547	0.229	39.513	4.048
268	BUSULFAN	NEG	0.0456	NEG	Test	-0.5	5.47	5.591	194.85	0.592	8.827	2
269	BUTACAINE	NEG	0.9068	POS	Training	3.373	10.36	12.007	313.404	0.282	20.439	3.414
270	CAFFEINE	NEG	0.0289	NEG	Test	0.736	5.359	4.832	122.226	0.526	9.388	2.965
271	Cangrelor	NEG	0.8951	POS	Training	1.536	14.647	21.171	2037.44	0.199	50.184	5.955
272	CAPOBENIC ACID	NEG	0.2056	NEG	Test	1.429	8.396	9.689	352.956	0.313	18.503	3.582
273	CAPSAICIN	POS	0.3323	NEG	Training	2.881	8.815	10.702	311.001	0.298	20.521	3.277
274	CARBACHOL	NEG	0.0117	NEG	Training	-3.954	6.153	4.639	68.952	0.666	8.61	1.52
275	CARBAMAZEPINE	NEG	0.2986	NEG	Training	2.589	9.339	8.295	183.75	0.381	13.79	3.607
276	CARBIMAZOLE	NEG	0	NEG	Training	0.161	5.724	5.688	110.024	0.573	8.138	2
277	CARBINOXAMINE	NEG	0.3934	NEG	Training	2.303	10.558	11.189	278.507	0.315	14.392	3.414
278	CARTEOLOL	NEG	0.1703	NEG	Training	1.306	9.833	10.298	284.305	0.317	13.624	3.466
279	CHLORIMIPRAMINE	POS	0.9912	POS	Training	4.372	11.947	12.76	328.42	0.273	29.631	3.875
280	CHLOROPROCAINE	NEG	0.2594	NEG	Training	2.654	8.718	9.163	240.125	0.372	20.695	2.645
281	CHLORPROMAZINE	POS	0.9944	POS	Test	3.768	11.845	12.991	334.679	0.29	19.846	3.867
282	CHLORPROPAMIDE	NEG	0.1571	NEG	Training	1.426	9.468	9.071	248.543	0.453	12.296	2.973
283	CHLORPROTHIXENE	POS	0.9129	POS	Training	4.801	11.968	12.996	328.24	0.292	15.43	3.867
284a	CINCHOCAINE	POS	0.7019	POS	Training	3.282	10.2	12.588	395.142	0.254	16.966	3.596
285	CINCHOPHEN	NEG	0.305	NEG	Training	2.191	8.416	8.068	204.912	0.377	6.783	3.535
286	CIPROFLOXACIN	NEG	0.2678	NEG	Test	1.671	9.798	9.946	366.138	0.309	19.025	4.284
287	CLAVULANATE POTASSIUM	NEG	0.0385	NEG	Training	-0.154	5.98	4.913	128.372	0.58	10.504	2.984
288	CLOMIPHENE	POS	0.9134	POS	Training	5.67	12.601	15.655	552.373	0.216	33.745	3.753
289	CLOTRIMAZOLE	POS	0.9848	POS	Training	4.925	13.298	12.967	395.481	0.26	21.944	3.669
290	CLOXACILLIN	POS	1	POS	Training	2.713	13.747	14.574	634.748	0.261	30.535	4.898
291	CLOXYQUIN	NEG	0.4144	NEG	Test	2.535	4.819	4.95	101.381	0.583	5.771	2.343
292	CLOZAPINE	POS	0.9933	POS	Test	2.965	11.62	12.15	354.2	0.272	23.025	4.215
293	CO-DIOVAN	POS	1	POS	Training	4.152	12.89	15.374	639.517	0.219	35.595	4.414
294	COLCHICINE	POS	0.5618	NEG	Training	1.368	11.432	12.646	536.094	0.241	50.118	4.603
295	CORTISONE	POS	0.8418	POS	Training	1.528	11.967	12.275	435.438	0.277	45.753	4.832
296	COUMARIN	NEG	0.1956	NEG	Test	2.265	4.294	3.954	67.746	0.634	2.37	2
297	CROMOLYN	NEG	0.2741	NEG	Training	-0.042	11.381	13.796	739.174	0.242	17.572	5.057
298	CYCLANDELATE	POS	0.6156	POS	Test	3.015	9.618	9.896	253.598	0.329	22.502	3.349
299	CYCLOBENZAPRINE	POS	0.7908	POS	Training	4.683	11.06	11.494	252.197	0.287	21.501	3.607
300	CYCLOSERINE	NEG	0.0167	NEG	Test	-1.497	3.612	2.178	31.485	1.04	1.664	0.468
301	CYCLOSPORIN A	POS	0.8338	POS	Training	-0.321	27.47	46.006	4965.79	0.085	266.791	6.33
302	CYSTEAMINE	NEG	0.1509	NEG	Training	-0.172	4.01	2.664	15.373	1.343	0.128	0
303	DAPSONE	NEG	0.1815	NEG	Training	2.061	9.044	8.212	201.024	0.442	12.769	3.414
304	DASATINIB	POS	1	POS	Training	3.268	12.345	16.48	800.193	0.207	28.012	4.841
305	DAZOXIBEN	NEG	0.1014	NEG	Training	1.315	7.047	6.864	176.929	0.423	8.981	3.16
306	DEBRISOQUIN	NEG	0.0244	NEG	Test	1.564	7.315	6.098	99.388	0.489	10.54	2.331
307	DERACOXIB	POS	0.546	NEG	Training	2.411	9.553	10.387	526.895	0.31	22.755	4.502
308	DESIPRAMINE	POS	0.6606	POS	Training	3.644	10.604	10.673	235.609	0.293	26.854	3.607
309	DEVAZEPIDE	POS	0.9967	POS	Training	3.615	12.467	14.831	561.355	0.226	19.058	4.414
310	DEXTROTHYROXINE SODIUM	POS	0.8696	POS	Training	1.774	20.523	27.959	1857.03	0.3	12.843	4.879
311	DIAZOXIDE	NEG	0.0949	NEG	Training	1.495	6.497	6.169	169.394	0.545	7.25	2.933
312	DIBENZOTHIOPHENE	NEG	0.6802	POS	Training	3.876	5.926	6.326	108.112	0.472	6.095	2.938
313	DICHLORPHENAMIDE	NEG	0.2022	NEG	Test	0.198	7.976	7.798	299.07	0.563	7.423	2.825
314	DICLOFENAC	POS	0.8735	POS	Training	3.988	11.566	10.381	285.836	0.384	23.21	3.604
315	DICUMAROL	POS	0.7649	POS	Training	2.918	10.971	11.18	377.2	0.308	11.753	4.012
316	DICYCLOMINE	POS	0.8267	POS	Training	3.779	11.28	11.975	320.081	0.26	33.09	3.546
317	DIFTALONE	NEG	0.576	NEG	Training	2.986	8.043	8.292	230.967	0.352	6.961	3.702
318	DIGITOXIN	POS	0.9123	POS	Training	1.662	20.962	28.191	1996.65	0.126	145.444	6.004
319	DIGOXIN	POS	0.7734	POS	Training	0.957	18.065	27.294	2081.51	0.126	103.825	6.058
320	DIHYDRALAZINE	NEG	0.1447	NEG	Training	2.26	5.95	5.17	117.335	0.49	6.165	2.583
321	DIIODOHYDROXYQUINOLINE	NEG	0.4693	NEG	Training	3.648	8.465	12.602	428.474	0.51	3.405	2.594
322	DIMENHYDRINATE	NEG	0.3344	NEG	Test	3.262	10.021	10.178	215.954	0.317	10.75	3.247
323	DIMETHADIONE	NEG	0.003	NEG	Training	-0.741	4.715	3.153	51.933	0.863	2.071	1.661
324	DIMETHISOQUIN	POS	0.6361	POS	Training	3.589	10.312	10.709	246.44	0.298	25.167	3.42
325	DIPHENYLPYRALINE	NEG	0.8259	POS	Training	3.34	11.099	11.39	263.404	0.283	13.228	3.414
326	DIPROPHYLLINE (DYPHYLLINE)	NEG	0.173	NEG	Training	-0.151	7.357	6.848	212.811	0.431	14.214	3.588
327	DISULFIRAM	POS	0.77	POS	Test	1.761	13.636	14.507	284.259	0.359	24.137	2.618
328	DITIOCARB	POS	0.0059	NEG	Training	1.064	7.567	6.303	66.93	0.705	6.303	0.382
329	DOBUTAMINE	NEG	0.6091	NEG	Training	2.66	9.618	10.708	302.516	0.31	21.644	3.465
330	DOCOSANOL	NEG	0.3563	NEG	Training	6.802	8.184	11.989	357.892	0.224	20.774	3.081
331	DOFETILIDE	NEG	0.5621	NEG	Training	1.143	11.37	14.567	652.879	0.254	36.167	4.947
332	DONEPEZIL	POS	0.9563	POS	Training	3.516	10.928	13.364	483.898	0.226	22.311	4.845
333	DOPAMINE	NEG	0	NEG	Training	0.744	5.873	4.631	74.864	0.647	8.56	1.611
334	DOPEXAMINE	NEG	0.7236	POS	Training	3.294	9.488	12.709	426.458	0.242	20.262	3.631
335	DOXYLAMINE	NEG	0.2308	NEG	Training	2.035	10.347	10.281	242.646	0.306	14.998	3.247
336	DROPERIDOL	POS	0.9876	POS	Training	3.069	11.682	13.564	483.012	0.253	24.208	4.607
337	DYCLONINE	POS	0.4938	NEG	Training	2.977	9.965	11.226	278.893	0.289	17.462	3.414
338	EBSELEN	POS	0.2211	NEG	Training	3.112	9.269	8.797	230.895	0.413	4.592	3.305
339	ECONAZOLE	POS	0.975	POS	Training	4.414	13.622	14.355	480.671	0.28	29.656	3.965
340	ENALAPRILAT	NEG	0.3091	NEG	Training	1.176	11.005	11.868	405.977	0.299	32.985	3.737
341	ENPROFYLLINE	NEG	0.0331	NEG	Training	0.736	6.678	5.469	122.226	0.524	14.21	2.81
342	ENROFLOXACIN	NEG	0.4401	NEG	Training	2.135	10.408	11.171	432.319	0.279	25.632	4.943
343	EPANOLOL	POS	0.2899	NEG	Training	1.05	11.399	13.208	457.497	0.269	22.359	3.675
344	ESTRIOL	NEG	0.5045	NEG	Training	2.799	10.556	10.215	276.613	0.313	29.718	4.531
345	ESTRONE	NEG	0.7304	POS	Training	3.544	10.612	9.962	242.601	0.32	25.809	4.401
346	ETHACRIDINE	POS	0.3631	NEG	Training	1.85	6.8	7.39	211.98	0.351	11.891	3.593
347	ETHIONAMIDE	NEG	0.0031	NEG	Training	0.83	6.926	6.023	86.871	0.58	7.846	1.634
348	ETHOPROPAZINE	POS	0.9373	POS	Training	3.732	12.589	12.947	324.054	0.267	38.296	3.751
349	ETHOSUXIMIDE	NEG	0.0175	NEG	Training	0.391	6.07	4.29	63.108	0.715	6.707	1.681
350	ETHOTOIN	NEG	0.0311	NEG	Test	0.962	8.015	6.734	135.934	0.474	10.678	3.027
351	ETHYL CARBAMATE	NEG	0.2251	NEG	Training	-0.703	2.984	2.04	23.545	1.209	3.911	0
352	ETIDRONATE	NEG	0.04	NEG	Test	-2.832	5.558	3.951	133.268	0.917	4.333	2
353	ETOMIDATE	POS	0.1667	NEG	Test	2.37	9.586	8.733	196.727	0.372	17.24	3.247
354	FELBAMATE	NEG	0.0211	NEG	Training	0.2	7.461	6.979	186.337	0.445	15.583	3
355	FENCLOFENAC	POS	0.7835	POS	Training	3.988	10.755	10.06	287.649	0.389	10.739	3.606
356	FENCLOZIC ACID	NEG	0.0906	NEG	Training	2.098	8.14	8.187	207.243	0.456	7.03	3.271
357	FENOBAM	NEG	0.313	NEG	Training	1.761	8.299	8.301	232.188	0.41	10.086	3.479
358	FENOLDOPAM	NEG	0.4478	NEG	Training	2.299	9.974	9.533	308.361	0.339	17.883	3.881
359	FENOTEROL	NEG	0.5315	NEG	Training	1.635	10.679	10.419	306.265	0.328	22.869	4.057
360	FLECAINIDE	POS	0.6338	POS	Training	2.515	9.19	10.232	575.147	0.31	20.161	3.952
361	FLUCLOXACILLIN	POS	0.9968	POS	Training	3.093	13.61	14.471	688.99	0.263	30.796	4.907
362	FLUDROXYCORTIDE	POS	0.7217	POS	Training	2.001	13.397	14.425	641.987	0.233	61.167	5.509
363	FLUMAZENIL	NEG	0.4545	NEG	Training	2.322	9.392	9.251	305.416	0.345	22.302	4.08
364	FLUMETASONE	POS	0.8597	POS	Training	1.962	12.444	12.922	566.091	0.271	55.677	5.299
365	FLUNARIZINE	POS	0.9989	POS	Test	5.278	12.532	14.817	550.337	0.226	25.647	4.845
366	FLUOROMETHOLONE	POS	0.971	POS	Training	2.642	12.42	12.959	475.498	0.27	53.467	5.005
367	FLUOXETINE	POS	0.8356	POS	Test	4.153	9.693	9.967	317.865	0.343	20.597	3.414
368	FLUPHENAZINE	POS	1	POS	Test	2.955	12.618	15.157	642.4	0.24	31.217	4.619
369	FLURBIPROFEN	NEG	0.3598	NEG	Training	3.895	8.052	7.382	196.28	0.417	9.368	3.247
370	FLUTAMIDE	POS	0.6163	POS	Training	3.16	6.603	6.081	251.2	0.48	13.309	3.504
371	FOLIC ACID	NEG	0.2264	NEG	Training	0.573	9.146	11.798	655.87	0.252	26.443	4.965
372	Folinic acid	NEG	0.1187	NEG	Training	0.167	10.982	13.719	756.118	0.237	32.389	5.006
373	FPL-55712	POS	0.9811	POS	Training	2.079	16.2	17.683	840.064	0.21	61.794	5.019
374	FUROSEMIDE	NEG	0.174	NEG	Training	0.434	8.229	8.533	359.498	0.39	11.135	3.557
375	GABAPENTIN	NEG	0.0286	NEG	Training	1.149	7.422	5.751	94.667	0.554	14.046	2
376	Gavestinel	POS	0.9273	POS	Training	3.512	10.956	12.582	466.26	0.304	17.005	4.642
377	GEMIFLOXACIN	NEG	0.7055	POS	Training	2.015	10.894	11.899	508.427	0.271	24.229	4.918
378	GLAFENINE	POS	0.964	POS	Training	2.408	12.613	13.278	463.014	0.282	23.765	4.184
379	GLIBENCLAMIDE	POS	0.9852	POS	Training	2.52	13.473	17.769	820.14	0.221	31.44	4.949
380	GLICLAZIDE	NEG	0.582	NEG	Training	1.878	10.658	11.03	346.837	0.321	20.141	4.362
381	GLIMEPIRIDE	POS	0.9802	POS	Training	1.863	13.079	17.28	811.791	0.213	43.78	4.862
382	GLYCERYL GUAIACOLATE	NEG	0.0122	NEG	Training	0.557	5.831	5.612	127.628	0.499	4.598	2.273
383	GUAIACOL	NEG	0.0272	NEG	Training	1.246	4.147	3.275	48.126	0.742	3.708	1.061
384	GUANETHIDINE	NEG	0.0348	NEG	Training	1.051	8.566	7.462	128.593	0.413	18.41	2.347
385	GW 572016	POS	0.893	POS	Training	3.87	18.304	21.9	1140.54	0.183	56.168	5.292
386	HALCINONIDE	POS	0.8576	POS	Training	2.979	14.21	15.449	695.513	0.229	62.99	5.428
387	HALOPERIDOL	POS	0.991	POS	Training	4.006	12.132	14.114	471.166	0.271	22.726	4.173
388	HEXAMETHYLENE BISACETAMIDE	NEG	0.0237	NEG	Training	0.93	6.633	6.498	130.895	0.473	18.056	1.766
389	HEXOPRENALINE	NEG	0.3923	NEG	Training	0.763	9.254	12.732	595.311	0.242	23.13	4.03
390	HEXYLCAINE HYDROCHLORIDE	NEG	0.4474	NEG	Training	3.04	9.859	10.098	226.326	0.327	10.464	3.247
391	HISTAMINE	NEG	0.066	NEG	Training	-0.34	4.786	3.474	38.268	0.761	3.632	0.428
392a	HYCANTHONE	POS	0.9485	POS	Training	2.772	11.476	13.168	423.847	0.262	28.306	3.813
393	HYDRALAZINE	NEG	0.4565	NEG	Training	1.928	5.169	4.381	82.212	0.553	3.871	2.288
394	HYDROFLUMETHIAZIDE	NEG	0.3342	NEG	Training	-0.077	7.156	6.646	360.037	0.482	12.854	3.883
395	HYDROXYZINE	POS	0.8911	POS	Test	2.634	11.694	14.084	469.251	0.243	25.18	3.71
396	IBUPROFEN	NEG	0.5952	NEG	Training	3.23	8.182	7.206	139.207	0.446	15.064	2.473
397	IMATINIB	POS	0.9017	POS	Training	2.907	14.158	19.725	824.543	0.178	21.651	5.127
398	IMILOXAN	POS	0.1733	NEG	Test	1.908	9.063	8.732	196.727	0.348	18.044	3.455
399	INDALPINE	NEG	0.0899	NEG	Training	2.546	9.401	9.076	171.854	0.338	13.8	3.247
400	INDAPAMIDE	POS	0.7122	POS	Test	2.536	10.685	11.634	443.337	0.314	17.997	4.191
401	INDOMETHACIN	POS	0.8722	POS	Training	3.318	10.53	11.465	425.657	0.297	27.127	4.591
402a	INDORAMIN	POS	0.9877	POS	Training	2.883	11.797	13.808	404.577	0.245	31.68	4.175
403	IODIPAMIDE MEGLUMINE	NEG	0.9244	POS	Training	4.896	21.885	35.954	4151.41	0.222	15.637	4.996
404	IPRONIAZID	NEG	0.0011	NEG	Test	0.721	6.982	5.878	103.903	0.514	8.409	1.893
405	IPSAPIRONE	POS	0.8902	POS	Training	1.637	10.922	13.388	539.696	0.252	25.262	4.008
406	ISOETHARINE	NEG	0.0976	NEG	Training	1.401	8.935	8.106	188.67	0.406	25.68	2.528
407	ISONIAZID	NEG	0.0152	NEG	Training	-0.283	4.533	3.522	59.26	0.724	3.251	1.471
408	ISOPROTERENOL	NEG	0.027	NEG	Training	0.848	7.057	6.489	145.851	0.472	9.813	2.377
409	ISOXSUPRINE	NEG	0.3156	NEG	Test	2.392	10.583	11.183	302.516	0.304	28.152	3.465
410	IVERMECTIN	POS	0.9511	POS	Training	1.829	20.895	31.555	2618.64	0.108	165.332	6.266
411	KETOCONAZOLE	POS	0.9619	POS	Training	2.999	13.744	18.051	951.081	0.188	39.936	5.172
412	KETOTIFEN	NEG	0.9822	POS	Test	3.528	12.255	12.256	317.266	0.287	23.981	4.034
413	KS-01019	POS	1	POS	Training	4.004	13.94	15.875	590.427	0.22	53.715	4.865
414	LABETALOL	NEG	0.85	POS	Training	2.674	10.771	11.97	360.349	0.293	19.359	3.629
415	LECOZOTAN	POS	0.9797	POS	Training	2.447	13.729	17.692	790.589	0.188	38.631	4.701
416	LEFLUNOMIDE	POS	0.4058	NEG	Training	2.369	7.072	6.59	240.21	0.448	9.783	3.414
417	LEMAKALIM	NEG	0.14	NEG	Test	1.22	10.368	9.755	272.167	0.339	20.723	4.17
418	LETROZOLE	POS	0.6094	POS	Training	3.104	10.782	10.749	270.271	0.327	12.092	3.414
419	LEVAMISOLE	NEG	0.1877	NEG	Training	2.286	9.593	8.613	134.244	0.418	7.315	3.247
420	LEVETIRACETAM	NEG	0	NEG	Training	-0.083	6.466	5.115	93.277	0.589	11.24	1.747
421	LEVOFLOXACIN	NEG	0.0365	NEG	Training	1.146	10.24	10.65	436.861	0.285	17.089	4.842
422	LIGUSTRAZINE	NEG	0.0032	NEG	Training	0.652	5.27	4.127	58.92	0.59	7.004	1.438
423	LIOTHYRONINE SODIUM	POS	0.7761	POS	Training	1.341	17.313	22.028	1289.75	0.315	14.169	4.043
424	LIPOIC ACID	NEG	0.0446	NEG	Training	1.668	7.928	7.905	134.663	0.53	6.144	1.825
425	LONAPALENE	POS	0.5736	NEG	Training	2.675	9.597	10.09	380.067	0.324	24.186	4.218
426	LOSARTAN	POS	0.9933	POS	Test	4.551	13.075	15.524	599.718	0.224	25.409	4.65
427	LY 171883	POS	0.6793	POS	Training	3.228	8.659	9.856	338.003	0.299	19.238	3.501
428	MECLOFENAMIC ACID	POS	0.7551	POS	Training	3.988	9.86	9.45	285.836	0.385	14.579	3.466
429	MEGESTROL ACETATE	POS	0.9886	POS	Training	3.686	13.077	13.868	496.978	0.241	58.723	4.965
430a	MELPHALAN	POS	0.1375	NEG	Training	0.16	9.571	9.946	304.539	0.371	17.145	3.247
431	MEMANTINE	NEG	0.8882	POS	Training	4.415	14.785	18.517	904.796	0.183	102.168	5.543
432	MEPENZOLATE BROMIDE	NEG	0.3544	NEG	Test	-0.805	11.953	12.771	387.918	0.266	22.403	3.79
433	MEPHENESIN	NEG	0.0156	NEG	Test	1.097	6.567	5.771	107.413	0.526	11.067	2
434	MEPHENYTOIN	NEG	0.0398	NEG	Training	1.243	8.28	7.155	155.977	0.441	15.196	3.247
435	MEPINDOLOL	POS	0.2467	NEG	Test	1.563	8.91	9.414	227.946	0.335	13.898	3.4
436	MEPRYLCAINE	NEG	0.1667	NEG	Training	2.926	8.429	8.593	182.492	0.375	11.368	3.086
437	MEPYRAMINE	NEG	0.4573	NEG	Training	2.575	9.987	10.485	270.902	0.291	24.537	3.414
438	MESALAZINE	NEG	0.0452	NEG	Training	1.103	3.444	3.263	74.437	0.741	5.306	1.623
439	METADOXINE	NEG	0.0197	NEG	Training	-0.724	5.331	4.463	91.857	0.621	9.108	2.193
440	METAPROTERENOL	NEG	0.0093	NEG	Training	0.848	6.964	6.431	145.851	0.472	7.64	2.382
441	METARAMINOL	NEG	0	NEG	Training	0.793	6.54	5.267	89.941	0.587	7.526	2
442	METERGOLINE	POS	0.9933	POS	Test	2.867	12.455	15.356	548.156	0.213	30.46	4.955
443	METHAPYRILENE	NEG	0.5525	NEG	Training	2.448	10.604	10.206	224.243	0.33	21.559	3.247
444	METHIMAZOLE	NEG	0.0567	NEG	Training	-0.051	4.539	3.961	38.253	0.853	0.862	0.468
445	METHOCARBAMOL	NEG	0.0372	NEG	Training	0.01	7.038	6.892	191.114	0.432	8.511	2.741
446	METHOXAMINE	NEG	0.009	NEG	Training	0.848	7.116	6.5	145.851	0.447	15.489	2.58
447	METHYLTHIOURACIL	NEG	0.0493	NEG	Training	0.1	4.904	4.563	61.759	0.783	2.127	1
448	METRIZAMIDE	NEG	0.6322	POS	Training	0.227	13.182	17.263	1972.95	0.243	26.385	5.156
449	METYRAPONE	POS	0.0401	NEG	Training	1.474	9.373	8.161	168.224	0.397	11.632	3.247
450	MIANSERIN	POS	0.6416	POS	Training	3.376	11.144	10.536	231.899	0.295	22.544	3.754
451	MINIZIDE	POS	0.1458	NEG	Training	1.241	9.772	11.556	493.154	0.248	24.396	4.535
452	MINOCROMIL	NEG	0.1622	NEG	Training	1.252	9.591	10.149	424.466	0.303	11.849	4.486
453	MITOTANE	POS	0.8626	POS	Training	5.934	12.226	11.943	330.592	0.374	12.184	3.414
454	MOXIFLOXACIN	NEG	0.9511	POS	Training	1.822	11.678	12.863	541.312	0.249	30.015	4.946
455	N-ACETYL PROCAINAMIDE	NEG	0.2706	NEG	Training	1.769	9.04	9.647	255.366	0.336	24.993	3.285
456	NAFRONYL	POS	1	POS	Training	3.604	12.813	15.12	494.571	0.223	37.02	4.06
457	NAFTOPIDIL	POS	0.9967	POS	Test	2.651	11.687	14.58	518.013	0.221	21.967	4.161
458	NAPHAZOLINE	NEG	0.3661	NEG	Training	2.934	9.254	8.175	144.897	0.38	15.929	3.239
459	NAPROXEN	NEG	0.2444	NEG	Test	2.758	7.3	6.901	174.109	0.415	12.768	3.215
460	NEDOCROMIL	NEG	0.2822	NEG	Test	1.485	10.697	11.111	461.621	0.297	24.616	4.592
461	NEFAZODONE	POS	1	POS	Training	4.236	13.22	18.04	743.816	0.195	30.484	4.806
462	NEOSTIGMINE	NEG	0.1519	NEG	Training	-1.833	8.05	7.527	163.69	0.408	15.092	2.735
463	NEVIRAPINE	POS	0.1303	NEG	Training	2.165	9.775	9.091	234.72	0.335	19.316	4.025
464	NICARDIPINE	POS	1	POS	Test	3.081	13.148	16.084	776.798	0.209	42.974	4.822
465	NIFEDIPINE	POS	0.1918	NEG	Training	2.07	10.662	10.4	400.624	0.311	33.613	4.44
466	NILVADIPINE	POS	0.5256	NEG	Training	1.723	11.015	11.664	497.971	0.283	25.903	4.55
467	NOMIFENSIN	NEG	0.3062	NEG	Training	2.895	9.843	9.155	187.523	0.339	13.522	3.46
468	OFLOXACIN	NEG	0.0302	NEG	Training	1.146	10.125	10.628	436.861	0.285	16.254	4.842
469	OLANZAPINE	POS	0.4451	NEG	Training	2.307	10.772	11.256	323.619	0.275	21.02	4.185
470	ORPHENADRINE	NEG	0.8507	POS	Training	3.5	10.603	10.848	240.971	0.3	17.277	3.505
471	OXEDRINE	NEG	0	NEG	Test	0.793	6.196	5.262	89.941	0.569	7.167	2
472	OXETHAZAINE	POS	0.9119	POS	Training	3.09	15.037	18.697	739.477	0.195	69.416	5.002
473	OXIBENDAZOLE	NEG	0.276	NEG	Training	1.423	5.849	6.467	204.683	0.383	7.296	3.151
474	OXPRENOLOL	NEG	0.2154	NEG	Training	1.831	8.096	9.129	233.224	0.338	5.936	3.163
475	PANTOLACTONE	NEG	0.0755	NEG	Training	0.146	5.371	3.515	53.029	0.802	4.023	1.687
476	PANTOTHENIC ACID	NEG	0.0066	NEG	Training	-0.527	7.533	6.314	156.985	0.538	15.396	2.3
477	PAPAVERINE	POS	0.9595	POS	Training	2.443	11.688	12.134	385.049	0.263	30.575	4.359
478	PARBENDAZOLE	NEG	0.2356	NEG	Test	2.199	7.693	7.941	201.672	0.371	11.325	3.151
479	PARGYLINE	NEG	0.3175	NEG	Training	2.746	8.291	6.522	81.685	0.506	5.359	1.555
480	PAROXETINE HYDROCHLORIDE	POS	0.8047	POS	Training	3.289	10.227	10.918	361.958	0.278	22.105	4.025
481	PENTAMIDINE	NEG	0.7683	POS	Training	3.068	8.182	10.594	387.746	0.273	18.277	3.735
482	PENTYLENETETRAZOLE	NEG	0.0492	NEG	Training	1.666	6.366	4.423	60.449	0.588	6.584	1.838
483	PERHEXILINE	POS	0.736	POS	Training	4.829	11.937	11.923	256.732	0.25	39.372	3.306
484	PERPHENAZINE	POS	0.9978	POS	Test	2.634	13.529	16.172	544.393	0.23	30.64	4.135
485	PF-1913539	POS	0.7767	POS	Test	2.875	10.449	11.94	341.204	0.251	23.543	4.885
486	PHENACEMIDE	NEG	0.0315	NEG	Training	0.759	7.012	5.681	102.418	0.577	4.66	1.895
487	PHENELZINE	NEG	0.1773	NEG	Training	1.856	6.134	4.912	58.92	0.594	6.092	1.287
488	PHENETHICILLIN	POS	0.8742	POS	Training	1.573	11.918	12.388	442.515	0.297	29.915	4.802
489	PHENFORMIN	NEG	0.0583	NEG	Training	1.493	7.688	6.913	137.648	0.455	11.044	2.51
490	PHENIRAMINE MALEATE	NEG	0.2898	NEG	Training	2.627	9.743	9.515	190.869	0.332	20.292	3.247
491	PHENSUXIMIDE	NEG	0.0087	NEG	Training	1.364	7.687	6.271	116.132	0.508	10.814	2.647
492	PHENTOLAMINE	NEG	0.2903	NEG	Training	2.763	10.366	10.079	262.977	0.307	20.854	3.477
493	PHTHALYLSULFACETAMIDE	NEG	0.2722	NEG	Training	1.437	9.653	10.671	436.932	0.333	15.607	4.137
494	PHYTOMENADIONE	NEG	0.8339	POS	Training	6.674	13.442	19.213	686.926	0.187	29.673	4.641
495	PIMOZIDE	POS	0.9711	POS	Test	5.108	14.04	17.145	719.075	0.204	36.991	4.963
496a	PIOGLITAZONE	POS	0.7713	POS	Training	1.832	10.794	12.467	423.349	0.275	25.046	4.128
497	PIPERACILLIN	POS	0.3343	NEG	Training	0.391	13.885	16.819	903.983	0.216	29.476	5.151
498	PIPERONYL BUTOXIDE	POS	0.6215	POS	Training	2.11	10.457	12.601	383.126	0.252	22.642	3.466
499	PIRACETAM	NEG	0.0101	NEG	Training	-0.77	5.776	4.104	63.903	0.736	7.982	1.417
500	PIRENZEPINE	NEG	0.6775	POS	Training	1.113	12.132	12.627	413.411	0.262	27.962	4.345
501	PIRETANIDE	NEG	0.4322	NEG	Training	1.371	11.396	11.604	437.432	0.305	23.564	4
502	PRACTOLOL	NEG	0.1543	NEG	Training	1.193	7.435	8.267	234.871	0.356	12.488	3.211
503	PRAZIQUANTEL	POS	0.7417	POS	Training	2.591	11.058	11.472	325.691	0.281	25.733	3.951
504	PRIMAQUINE	POS	0.2692	NEG	Training	1.745	9.878	9.663	222.73	0.329	19.997	3.342
505	PROBENECID	NEG	0.09	NEG	Test	1.979	9.162	9.144	267.99	0.396	15.049	3.247
506	PROBUCOL	NEG	0.5662	NEG	Training	7.289	17.445	21.536	901.723	0.178	66.617	5.624
507	PROCAINE	NEG	0.0967	NEG	Test	2.123	7.95	8.11	183.933	0.384	14.187	2.618
508	PROCHLORPERAZINE	POS	1	POS	Training	3.223	13.017	15.067	464.799	0.24	23.536	4.135
509	PROGESTERONE	POS	0.9751	POS	Training	4.05	12.142	12.228	330.509	0.271	43.245	4.727
510	PROPAFENONE	POS	0.7791	POS	Training	2.995	10.39	12.777	390.303	0.264	17.193	3.584
511	PROPANTHELINE BROMIDE	POS	0.6749	POS	Training	0.165	13.968	14.828	455.87	0.238	42.627	4.15
512	PROPRANOLOL	NEG	0.3249	NEG	Training	2.534	8.364	9.177	222.686	0.335	8.119	3.395
513	PROTOKYLOL HYDROCHLORIDE	NEG	0.2215	NEG	Training	1.383	11.232	11.205	366.512	0.293	27.227	4.177
514	PROTRIPTYLINE	POS	0.8538	POS	Training	4.533	11.1	11.145	230.265	0.297	23.33	3.607
515	PROXICROMIL	POS	0.7212	POS	Training	2.958	9.426	9.384	303.885	0.335	14.527	4.01
516	PS-291822	POS	0.6404	POS	Training	0.836	13.856	13.992	530.574	0.256	45.036	4.868
517	PTK-787	POS	0.9644	POS	Test	4.196	11.854	12.977	399.873	0.266	17.388	3.792
518	PYRIDOSTIGMINE BROMIDE	NEG	0	NEG	Training	0.405	6.288	5.494	106.183	0.511	8.315	2
519	PYRIMETHAMINE	POS	0.3186	NEG	Training	3.048	8.753	8.1	201.349	0.398	21.39	3.291
520	QUILOSTIGMINE	POS	0.9913	POS	Training	3.467	11.558	13.421	478.656	0.228	30.946	4.76
521	QUINACRINE	POS	1	POS	Training	3.908	13.029	15.744	535.767	0.222	39.754	4.868
522	RALFINAMIDE	POS	0.4006	NEG	Training	2.6	9.017	10.019	303.994	0.326	16.803	3.604
523	RAMATROBAN	POS	0.9969	POS	Training	2.551	12.192	13.443	581.057	0.264	28.402	4.649
524	RAMELTEON	POS	0.2334	NEG	Training	2.634	9.186	9.298	222.686	0.328	23.712	3.424
525	REMACEMIDE	POS	0.1647	NEG	Training	2.753	10.603	10.41	238.88	0.33	23.066	3.263
526	REMOXIPRIDE	POS	0.6967	POS	Test	2.205	11.103	12.299	443.687	0.292	24.807	3.489
527	RESERPINE	POS	0.6273	POS	Training	1.758	14.493	20.56	1258.59	0.156	61.728	5.675
528	RILUZOLE	POS	0.2244	NEG	Training	1.936	4.853	4.728	176.579	0.575	3.339	3.072
529	RIMONABANT	POS	1	POS	Training	5.081	13.47	16.452	717.977	0.227	35.146	4.79
530	RISPERIDONE	POS	0.9877	POS	Training	3.613	12.032	14.432	566.899	0.224	27.559	4.961
531	RO 1130830	POS	0.9216	POS	Training	2.474	11.346	13.141	605.34	0.269	22.909	4.679
532	ROFECOXIB	POS	0.8738	POS	Training	2.812	11.02	10.923	326.94	0.339	20.562	3.864
533	ROPIVACAINE	NEG	0.4251	NEG	Training	2.877	10.206	10.475	250.262	0.304	27.381	3.569
534	ROSIGLITAZONE	POS	0.7602	POS	Training	1.907	10.674	12.234	425.621	0.277	21.454	4.128
535	SALICIN	NEG	0.1532	NEG	Training	-1.172	8.684	8.305	271.378	0.386	18.077	3.596
536	Salicylamide	NEG	0.0404	NEG	Training	1.237	5.099	3.775	59.224	0.765	4.294	1.476
537	SALSALATE	NEG	0.6319	POS	Training	3.132	8.099	7.635	219.696	0.419	8.443	3.548
538	SCOPOLAMINE	NEG	0.1133	NEG	Training	1.419	11.284	10.587	306.265	0.305	24.446	3.919
539	SEMATILIDE	NEG	0.0774	NEG	Training	1.064	9.008	9.638	325.273	0.339	29.258	3.31
540	SERATRODAST	POS	0.8699	POS	Training	3.557	11.172	12.646	420.938	0.275	26.715	3.721
541	SERTRALINE	POS	0.9167	POS	Training	5.149	12.191	12.424	307.162	0.314	18.129	3.693
542	SIBENADET	POS	1	POS	Training	1.96	12.707	16.87	724.408	0.229	24.86	3.945
543	SILDENAFIL	POS	0.7954	POS	Training	1.51	13.469	16.445	758.656	0.212	39.159	5.004
544	SIROLIMUS	POS	0.8367	POS	Training	1.578	22.393	34.064	2859.82	0.108	146.854	5.932
545	SITAGLIPTIN	POS	0.8764	POS	Training	4.051	9.198	10.028	555.372	0.317	23.57	4.727
546	SIVELESTAT	POS	0.9904	POS	Training	2.045	11.794	13.743	633.241	0.266	28.361	4.597
547	SODIUM FUSIDATE	POS	0.2389	NEG	Training	-1.881	13.717	14.322	513.252	0.258	27.998	5.184
548	SPIPERONE	POS	1	POS	Training	3.358	12.637	14.39	525.616	0.24	43.244	4.441
549	SPIRAPRIL HYDROCHLORIDE	POS	1	POS	Training	2.077	14.004	16.789	730.922	0.225	50.94	4.212
550a	SU11248	POS	0.9049	POS	Training	2.373	11.276	13.803	533.716	0.244	30.559	4.871
551	SUCCINYLSULFATHIAZOLE	NEG	0.2744	NEG	Test	0.56	9.774	10.508	417.76	0.351	14.15	3.485
552	SULFACETAMIDE	NEG	0.0562	NEG	Training	0.108	7.396	6.307	147.525	0.577	10.691	2.538
553	SULFACHLORPYRIDAZINE	NEG	0.1278	NEG	Test	1.453	9.69	9.037	263.616	0.428	15.313	3.414
554	SULFADIAZINE	NEG	0.0431	NEG	Training	0.487	8.849	7.786	204.091	0.447	15.294	3.247
555	SULFADIMETHOXINE	NEG	0.2418	NEG	Training	1.444	9.274	9.104	318.032	0.359	21.023	3.414
556	SULFADIMIDINE	NEG	0.0776	NEG	Training	1.06	9.75	8.975	254.501	0.389	15.359	3.414
557	SULFADOXINE	NEG	0.1464	NEG	Training	1.038	10.223	9.435	318.032	0.359	26.175	3.414
558	SULFAMERAZINE	NEG	0.0176	NEG	Training	0.779	9.053	8.298	228.614	0.416	15.384	3.414
559	SULFAMETHIZOLE	NEG	0.0478	NEG	Test	0.667	8.95	8.297	237.233	0.443	9.361	3.281
560	SULFAMETHOXAZOLE	NEG	0.0444	NEG	Test	0.971	8.616	7.622	209.118	0.447	10.435	3.281
561	SULFISOXAZOLE	NEG	0.0909	NEG	Training	0.856	8.85	8.161	233.933	0.416	12.086	3.414
562	SULINDAC	POS	0.9574	POS	Training	4.277	11.137	11.999	422.871	0.301	24.101	4.584
563	SULPIRIDE	POS	0.0706	NEG	Training	0.437	9.411	10.417	387.478	0.315	20.266	3.886
564	SURAMIN	POS	0.7244	POS	Test	-0.841	20.22	41.355	5763.22	0.103	68.879	6.418
565	TACRINE	NEG	0.2317	NEG	Training	2.209	7.447	6.799	128.386	0.408	8.301	3.39
566	TALNIFLUMATE	NEG	0.9683	POS	Training	4.449	11.326	12.272	575.953	0.274	15.877	4.732
567	TAMOXIFEN	POS	0.9717	POS	Training	5.201	12.324	14.775	463.897	0.219	33.246	3.805
568	TELENZEPINE	NEG	0.7456	POS	Test	1.137	12.868	13.983	458.25	0.258	30.488	4.502
569	TERFENADINE	POS	0.9094	POS	Training	4.944	13.945	18.952	752.82	0.18	43.75	4.686
570	TETRACAINE	NEG	0.2149	NEG	Training	2.643	7.863	8.845	231.627	0.331	16.118	3.107
571	TETROQUINONE	NEG	0.0552	NEG	Training	-2.256	3.163	2.92	94.33	0.799	2.807	2
572	THALIDOMIDE	NEG	0.1917	NEG	Training	0.735	8.393	7.505	219.74	0.418	17.263	3.636
573	THIABENDAZOLE	NEG	0.0822	NEG	Test	1.526	5.324	6.181	129.793	0.461	5.576	3
574	THIORIDAZINE	POS	0.997	POS	Training	4.059	13.68	15.722	457.093	0.232	27.704	4.136
575	THIOTEPA	NEG	0.0067	NEG	Test	0.552	8.238	7.105	112.179	0.5	13.19	2.322
576	THIOTHIXENE	POS	1	POS	Training	2.64	14.43	17.364	659.859	0.218	31.646	4.889
577	TICLOPIDINE	POS	0.7673	POS	Training	3.609	10.92	10.674	225.599	0.355	11.055	3.446
578	TIPREDANE	POS	1	POS	Training	4.376	13.893	14.87	563.352	0.244	60.8	4.879
579	TOLAZAMIDE	POS	0.2319	NEG	Training	1.622	10.515	10.7	320.905	0.338	18.449	3.414
580	TOLAZOLINE	NEG	0.0449	NEG	Training	1.994	7.214	5.838	82.604	0.489	8.382	2.574
581	TOLBUTAMIDE	NEG	0.2318	NEG	Training	1.439	9.492	9.178	239.782	0.407	15.326	3.108
582	TOLCAPONE	POS	0.3312	NEG	Training	2.401	8.396	7.972	246.684	0.411	11.133	3.743
583	TOLNAFTATE	POS	0.7967	POS	Test	4.441	10.552	11.163	312.954	0.292	15.974	3.631
584	TOLRESTAT	POS	0.9307	POS	Training	3.274	11.004	11.175	424.022	0.346	22.277	4.263
585	TORSEMIDE	POS	0.0774	NEG	Training	0.86	10.994	11.747	403.913	0.306	17.775	4.062
586	TRAPIDIL	NEG	0.0511	NEG	Test	2.267	7.884	6.766	137.648	0.414	12.521	2.721
587	TRETINOIN	POS	0.7726	POS	Training	4.38	9.967	11.281	301.106	0.294	28.697	3.452
588	TRIFLUOPERAZINE	POS	1	POS	Training	3.55	12.225	14.15	555.82	0.252	24.732	4.619
589	TRIFLUPERIDOL	POS	0.8827	POS	Training	4.324	11.317	13.131	562.631	0.275	25.95	4.482
590	TRIFLUPROMAZINE	POS	0.9264	POS	Training	4.115	11.19	12.141	412.882	0.305	20.113	4.134
591	TRIMEBUTINE	POS	0.9656	POS	Training	3.002	11.41	13.267	504.34	0.237	31.893	4.263
592	TRIMEPRAZINE	POS	0.8933	POS	Test	3.5	12.651	12.197	294.844	0.281	28.606	3.786
593	TRIMETHOPRIM	NEG	0.1167	NEG	Test	1.261	8.788	8.911	279.802	0.325	20.389	3.769
594	TRIMETOZINE	NEG	0.0711	NEG	Test	0.565	8.473	8.401	262.19	0.337	16.237	3.274
595	TRIOXSALEN	NEG	0.6879	POS	Training	2.758	6.532	6.519	170.906	0.405	10.53	3.704
596	TRIPROLIDINE	POS	0.5045	NEG	Training	3.26	9.923	10.485	257.792	0.284	17.936	3.414
597	TROGLITAZONE	POS	0.9942	POS	Training	2.691	12.729	15.458	655.183	0.224	32.268	5.131
598	TROPICAMIDE	POS	0.3981	NEG	Training	1.553	11.64	10.507	268.651	0.322	39.335	3.319
599	TULOBUTEROL	NEG	0.1727	NEG	Training	2.777	8.566	8.15	167.833	0.425	11.966	2.397
600	URAPIDIL	POS	0.8381	POS	Training	1.553	10.555	13.221	504.445	0.237	27.241	4.031
601	UTIBAPRIL	POS	1	POS	Training	2.061	12.67	15.353	679.645	0.23	45.228	4.541
602	VALPROIC ACID	NEG	0.1404	NEG	Training	2.06	5.608	4.57	66.289	0.652	8.627	1
603	VENLAFAXINE	NEG	0.2333	NEG	Test	2.561	10.351	10.288	255.791	0.302	34.443	3.557
604	VERAPAMIL HYDROCHLORIDE	POS	0.9936	POS	Training	3.23	13.376	16.997	698.054	0.195	44.519	4.433
605	VX 745	POS	0.9534	POS	Training	5.495	13.593	14.745	632.559	0.277	16.636	4.841
606	WARFARIN	POS	0.7848	POS	Training	3.204	10.65	10.801	316.481	0.317	15.012	3.838
607	XALIPRODEN	POS	0.8738	POS	Training	5.662	10.724	12.94	487.922	0.258	23.917	4.414
608	XANTRYL	POS	0.4738	NEG	Training	5.159	25.141	34.268	3030.93	0.227	13.617	5.855
609	XYLAZINE	NEG	0.2114	NEG	Training	2.835	9.388	8.357	157.359	0.388	14.335	2.954
610	XYLOMETAZOLINE	NEG	0.43	NEG	Test	3.608	9.591	9.192	197.644	0.322	21.914	3.198
611	ZD-2486	NEG	0.6956	POS	Test	1.901	10.259	11.975	423.247	0.257	23.028	4.232
612	ZD-2574	POS	0.9969	POS	Training	2.957	12.478	14.207	570.472	0.242	28.024	4.431
613	ZD-6169	POS	0.7155	POS	Training	3.026	8.676	9.186	378.78	0.356	16.348	3.883
614	ZD-9379	NEG	0.391	NEG	Training	1.994	10.47	11.675	491.141	0.278	16.919	4.974
615	ZD-9583	POS	0.9856	POS	Test	2.406	14.793	16.588	684.859	0.212	57.137	4.659
616	ZILEUTON	NEG	0.06	NEG	Test	1.76	8.072	7.398	181.347	0.449	12.264	3
617	ZIMELDINE	POS	0.735	POS	Training	3.178	10.753	11.408	317.339	0.324	13.521	3.414
618	ZOXAZOLAMINE	NEG	0.2544	NEG	Training	1.872	4.234	4.387	88.402	0.633	3.762	2
1	ritonavir	POS	0.8711	POS	External set	1.524	18.678	27.508	1767.92	0.138	84.967	5.297
2	saquinavir	POS	0.9133	POS	External set	1.632	19.123	25.687	1532.75	0.143	88.491	5.814
3	nelfinavir	POS	0.9278	POS	External set	3.51	16.252	21.316	1092.53	0.167	63.183	5.335
4	lopinavir	POS	0.9756	POS	External set	2.911	16.77	23.693	1345.16	0.149	73.54	5.111
5	indinavir	POS	0.9656	POS	External set	1.725	16.437	23.499	1281.2	0.15	63.173	5.292
6	itraconazole	POS	0.8578	POS	External set	5.127	14.797	23.976	1691.03	0.138	56.48	5.408
7	glyburide	POS	0.9944	POS	External set	2.52	13.156	17.703	820.14	0.221	27.083	4.949
8	pazopanib	POS	0.9944	POS	External set	2.616	14.145	15.42	643.053	0.23	38.758	5.133
9	lapatinib	POS	0.9611	POS	External set	3.87	18.018	21.923	1140.54	0.183	56.046	5.292
10	gefitinib	POS	0.9989	POS	External set	2.907	12.402	15.097	670.391	0.221	27.435	4.505
11	erythromycin estolate	POS	0.9244	POS	External set	0.396	19.513	27.247	2130.7	0.128	144.702	5.787
12	valinomycin	POS	0.9233	POS	External set	0.676	24.716	39.895	4235.16	0.097	187.52	6.241
13	telithromycin	POS	0.9478	POS	External set	1.082	17.806	28.655	2252.29	0.12	115.427	6.133
14	wortmannin	POS	0.8667	POS	External set	1.594	13.152	13.769	617.705	0.24	52.764	5.379
15	staurosporine	POS	0.75	POS	External set	2.464	14.162	16.386	735.155	0.191	46.595	5.844
16	clofazimine	POS	0.9767	POS	External set	4.35	14.905	18.134	751.941	0.2	34.607	4.929
17	fusidic acid	POS	0.4533	NEG	External set	4.415	14.713	18.699	904.796	0.183	81.493	5.543
18	MK-571	POS	0.9978	POS	External set	4.384	12.232	17.846	891.282	0.204	27.215	4.661
19	17α ethinyl estradiol	POS	0.9089	POS	External set	4.004	11.299	11.239	292.761	0.295	35.027	4.465
20	taxol	POS	0.96	POS	External set	2.322	21.953	30.602	2491.28	0.122	129.512	6.036
21	fenofibrate	POS	0.9989	POS	External set	4.266	12.206	13.655	433.419	0.284	30.202	4.171
22	cinnarizine	POS	0.9578	POS	External set	4.541	13.342	15.849	456.411	0.216	24.41	3.677
23	telmisartan	POS	0.8856	POS	External set	5.702	14.564	19.109	897.105	0.174	47.634	5.268
24	benzbromarone	POS	0.9589	POS	External set	4.039	11.913	13.02	567.983	0.321	15.151	4.164
25	simvastatin	POS	1	POS	External set	4.004	13.967	15.894	590.427	0.22	55.061	4.865
26	rifampicin	POS	0.9578	POS	External set	0.567	21.187	29	2313.12	0.124	116.376	6.023
27	rifabutin	POS	0.9633	POS	External set	2.264	21.859	31.438	2451.85	0.117	126.571	6.262
28	oxybutynin	POS	0.95	POS	External set	3.26	13.19	14.2	428.68	0.248	38.966	3.669
29	finasteride	POS	0.97	POS	External set	3.652	12.9	14.33	466.513	0.233	55.437	4.946
30	flupirtine	POS	0.4589	NEG	External set	2.728	8.3	8.997	307.803	0.333	16.32	3.414
31	fluvastatin	POS	1	POS	External set	3.348	12.553	14.172	569.434	0.248	44.196	4.804
32	drotaverine	POS	1	POS	External set	2.996	13.46	15.073	531.545	0.215	43.328	4.428
33	ciglitazone	POS	0.7978	POS	External set	2.627	10.939	11.875	369.533	0.287	24.388	3.861
34	midazolam	POS	0.9333	POS	External set	4.27	11.672	11.668	351.229	0.303	18.033	4.259
35	acitretin	POS	0.6389	POS	External set	4.27	9.404	11.311	356.209	0.281	19.251	3.801
36	ciprofibrate	NEG	0.4533	NEG	External set	2.79	9.39	9.421	271.936	0.401	18.963	3.414
37	dicloxacillin	POS	1	POS	External set	3.204	13.55	14.755	738.59	0.254	31.192	4.907
38	D-penicillamine	NEG	0.0189	NEG	External set	-2.055	6.116	4.43	68.647	0.834	5.241	1.294
39	famotidine	NEG	0.3111	NEG	External set	0.083	8.422	10.046	373.584	0.382	11.765	3.276
40	nitrofurantoin	NEG	0.0289	NEG	External set	0.096	7.113	5.697	185.467	0.502	8.644	3.254
41	nomifensine	NEG	0.1056	NEG	External set	2.895	9.843	9.155	187.523	0.339	13.52	3.46
42	ranitidine	NEG	0.1278	NEG	External set	1.064	8.763	9.814	327.251	0.326	14.859	3.281
43	rifamycin SV	POS	0.9578	POS	External set	0.567	21.187	29	2313.12	0.124	116.376	6.023
44	valproate	NEG	0.0711	NEG	External set	2.06	5.734	4.715	66.289	0.652	6.343	1
45	carmustine	NEG	0.0522	NEG	External set	0.812	6.068	5.556	143.791	0.637	8.743	1.451
46	fialuridine	NEG	0.4022	NEG	External set	0.171	9.985	10.633	412.573	0.462	12.788	3.257
47	methotrexate	NEG	0.2856	NEG	External set	1.311	10.736	13.403	696.096	0.238	23.328	4.973
48	salicylic acid	NEG	0.0578	NEG	External set	1.643	3.395	3.074	59.955	0.802	3.201	1.476
49	amoxicillin	NEG	0.1022	NEG	External set	0.581	11.957	11.651	444.842	0.311	31.195	4.85
50	clobetasol propionate	POS	0.9956	POS	External set	3.412	14.234	15.923	733.399	0.229	58.791	5.281
51	physostigmine	NEG	0.16	NEG	External set	1.869	9.646	9.27	251.502	0.322	26.827	4.214
52	picotamide	NEG	0.56	NEG	External set	1.065	11.075	12.808	475.288	0.253	18.925	3.915
53	pinacidil	NEG	0.3844	NEG	External set	1.807	9.433	8.762	198.732	0.366	22.304	3.099
54	pyridoxine	NEG	0.0022	NEG	External set	-0.724	5.438	4.488	91.857	0.621	7.259	2.193
55	streptomycin	NEG	0.0678	NEG	External set	-5.199	13.478	16.279	1146.77	0.201	86.197	5.793
