# Supplementary material for: The in silico identification of human bile salt export pump (ABCB11) inhibitors associated with cholestatic drug-induced liver injury
Source: Royal Society of Chemistry journal article supplement (doi:10.1039/c6mb00744a), 2017-01-05
Supplement: c6mb00744a3.xlsx [file c6mb00744a3.xlsx]

## Sheet: Supplymentory_Table_S2
Table S2 The information of the screened drugs (pred.prob > 0.99 and Fit value > 3.0).
DATABASE_ID	Drug name	Pred.Prob	Fit value
DB00485	Dicloxacillin	1	3.518
DB00175	Pravastatin	1	3.442
DB06274	Alvimopan	1	3.38
DB01348	Spirapril	1	3.371
DB01095	Fluvastatin	1	3.353
DB09299	Tenofovir alafenamide	1	3.331
DB08860	Pitavastatin	1	3.329
DB04920	Clevidipine	1	3.302
DB09289	Tianeptine	1	3.274
DB00972	Azelastine	1	3.128
DB09292	Sacubitril	1	3.04
DB01605	Pivmecillinam	1	3.035
DB00699	Nicergoline	1	3.018
DB00607	Nafcillin	0.999	3.308
DB09082	Vilanterol	0.999	3.24
DB01604	Pivampicillin	0.999	3.193
DB00178	Ramipril	0.999	3.104
DB01039	Fenofibrate	0.999	3.082
DB09198	Lobeglitazone	0.998	3.452
DB01340	Cilazapril	0.998	3.366
DB09232	Cilnidipine	0.998	3.008
DB11362	Selexipag	0.997	3.414
DB01138	Sulfinpyrazone	0.997	3.349
DB08819	Tafluprost	0.997	3.119
DB09034	Suvorexant	0.996	3.19
DB01013	Clobetasol propionate	0.996	3.183
DB01130	prednicarbate	0.994	3.52
DB01007	Tioconazole	0.994	3.134
DB09006	Clinofibrate	0.994	3.013
DB08907	Canagliflozin	0.993	3.396
DB00796	Candesartan	0.993	3.162
DB03619	Deoxycholic Acid	0.993	3.102
DB00547	Desoximetasone	0.991	3.221
